# Supplementary material for: A Computational Assay of Estrogen Receptor α Antagonists Reveals the Key Common Structural Traits of Drugs Effectively Fighting Refractory Breast Cancers
Source: Springer Nature journal article supplement (doi:10.1038/s41598-017-17364-4), 2018-01-08
Supplement: MOESM1 [file 41598_2017_17364_MOESM1_ESM.pdf]

# Supporting Information

## **A Computational Assay of Estrogen Receptor $\alpha$ Antagonists Reveal the Key Common Structural Traits of Drugs Effectively Fighting Refractory Breast Cancers**

Matic Pavlin,<sup>a</sup> Angelo Spinello,<sup>a</sup> Marzia Pennati,<sup>b</sup> Nadia Zaffaroni,<sup>b</sup> Silvia Gobbi,<sup>c</sup> Alessandra Bisi,<sup>c</sup> Giorgio Colombo<sup>d</sup> and Alessandra Magistrato<sup>\*a</sup>

a CNR-IOM-Democritos c/o International School for Advanced Studies (SISSA), via Bonomea 265, 34136 Trieste, Italy

b Fondazione IRCSS Istituto Nazionale dei Tumori, via Amadeo 42, 20113 Milano, Italy

c Department of Pharmacy and Biotechnology, Alma Mater Studiorum-University of Bologna, Via Belmeloro 6, 40126 Bologna, Italy

d CNR-ICRM via Mario Bianco 9, 20131 Milano, Italy

### **Content**

1. Supporting Text S1 and S2
2. Supporting Figures S1 to S17
3. Supporting Tables S1 to S6

## Supporting Text

### S1. RMSF of agonist and antagonist ER $\alpha$ States

The first peak is located between residues 328 and 343 corresponds to the coil between H2 and H3 (hereafter named Coil2-3), Fig. S4 shows that the flexibility of this region is independent from both the ER $\alpha$  polymorphisms and the ligand type present in the binding site. The second peak lies between residues 458 and 478. These residues are part of H10, which, however, is involved neither in ligand binding nor interacting with the H12. By comparing the flexibility of these regions for the different mutants it is clear that no large differences are present and that in the presence of estrogens, (17-beta-estradiol) the effect of the mutant is reduced with respect to the WT. The only region in which the *apo* form has an increased flexibility is in the tract comprising 523 to 533 residues, located on the coil connecting H11 and H12. This results to be slightly more flexible in the *apo* form of all polymorphic variants.

Remarkably, in addition to the regions characterized by high mobility we register for the agonist conformation, the residues of the coil connecting H11 and H12. The mutants induce overall larger flexibility with respect to the WT. It is evident that AZD-9496 and fulvestrant, which are markedly larger than endoxifen, perturb the flexibility of this region even in the WT. The only mutant having a rigid structure independently of the ligand bound is the D538G, although the fluctuations in this region in the presence of endoxifen are larger for the polymorphic variants than for the WT. It is strikingly clear that in all polymorphic variants of ER $\alpha$  (mER $\alpha$ s) this coil is more flexible than in the WT complex with endoxifen, probably due to its tendency to rearrange towards an agonist-like conformation, as observed in other biophysical studies.<sup>1,2</sup>

In the endoxifen bound complexes these fluctuations are the lowest in the case of WT ER $\alpha$ , whereas they are evident in both monomers in the L536Q and Y537S polymorphisms. This suggests that endoxifen stabilizes the coil between H11 and H12 only in WT ER $\alpha$ , whereas in the mER $\alpha$  mutations induce coil's increased flexibility. Since the mutations lies within this coil it is clear that their impact on the flexibility of the antagonist form is huge.

### S2. Cross-correlation matrix calculations

Cross-correlation matrix – based on Pearson coefficients – between the fluctuations of the C $\alpha$  atoms relative to their average positions has been calculated to establish how the motions between the protein residues are correlated. Positive values describe a correlated motion between atoms, while negative values refer to the anti-correlated motions.

To provide a clearer picture of the correlation motion the per-residue cross correlation coefficients have been computed considering the only the most positive ( $\geq 0.6$ ) and negative ( $\leq -0.6$ ) Pearson correlations.

Since here we are considering only the LDB ER $\alpha$  inter and intra structural element correlations have been calculated by considering the cross correlation score of the sum of each residues within a selected region with the residues belonging to the different or the same structural element of the residue in consideration. These account for the degree of correlated and anti-correlated motion displayed by each region with the rest of the system. This has been done according to the structural motifs introduced in Figure 1, *i. e.* by dividing each monomer in 14 regions (as shown in Fig. 1 of the main text).<sup>3</sup> The cross correlation maps are normalized by columns (*i.e.* the cross correlation score are normalized with respect to the region, which in each column has the largest sum of the cross-correlation scores). Thus, these maps shows how each structural element on the x-axis correlates with any other structural element reported y-axis. Cross-correlation scores are reported in the range from -0.3 to 0.3 for clarity reasons. Blue and red colours account for positive and negative correlation, respectively.

We also show how each All figures of (m)ER $\alpha$ s were generated with UCSF Chimera visualization tool.<sup>4</sup> Plots were generated with gnuplot and xmgrace.

## 2. Supporting Figures

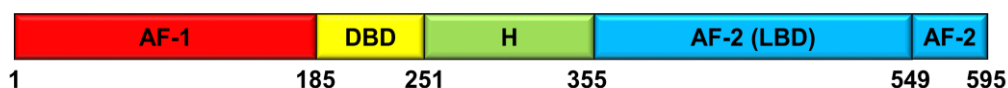

**Figure S1.** Schematic representation of five distinct functional domains of ER $\alpha$ : activation function domains AF-1 and AF-2, DNA-binding domain (DBD), hinge (H) and ligand-binding domain (LBD; which is part of AF-2). While LBD and DBD have ordered secondary structure, AF-1, non-LBD part of AF-2 and the hinge are structurally disordered. Thus, the tertiary structure of the full-length receptor is not known.

## RMSD of ER $\alpha$ dimer during 500 ns of classical MD simulations

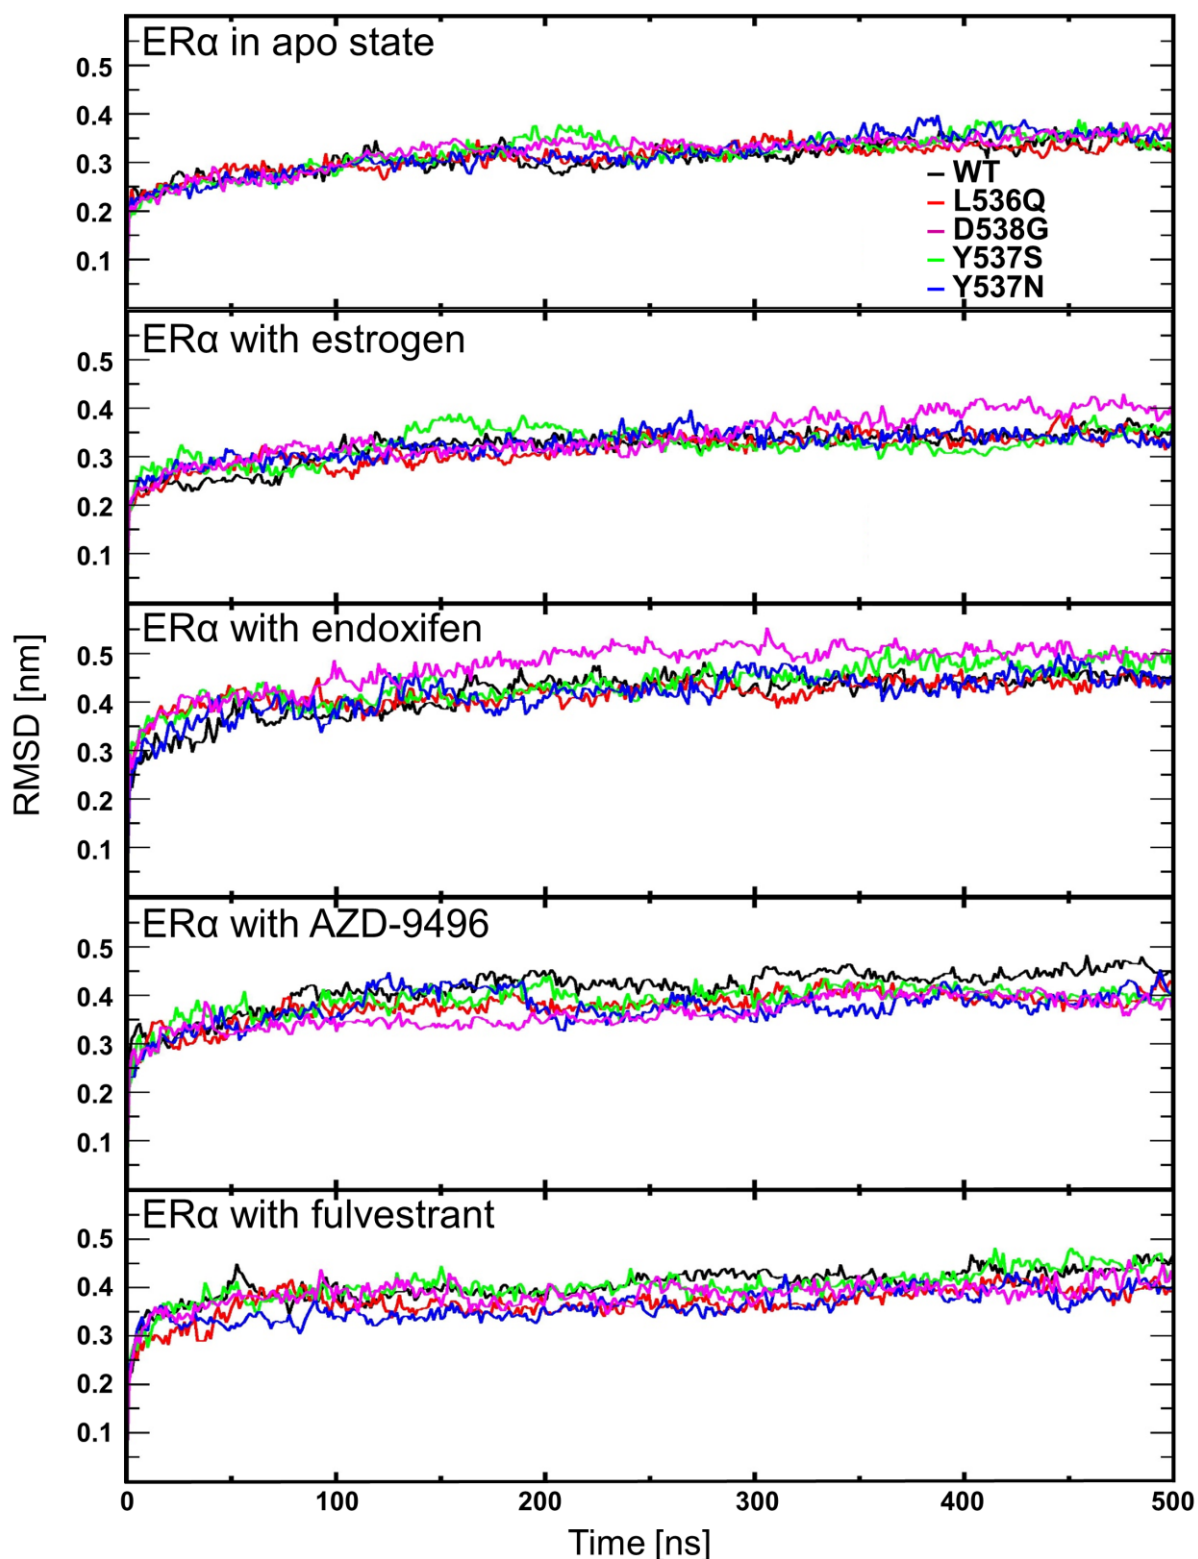

**Figure S2.** RMSD (nm) plots of ER $\alpha$  LBD dimer. 500 ns simulations of WT and mER $\alpha$ s in *apo* state and in complex with estrogen, endoxifen, AZD-9496 and fulvestrant (from top to bottom). WT ER $\alpha$  is plotted in black and mER $\alpha$  in red (L536Q), magenta (D538G), green (Y537S), and blue (Y537N).

Distance between centers of mass of ER $\alpha$  monomers during the 500 ns classical MD simulations

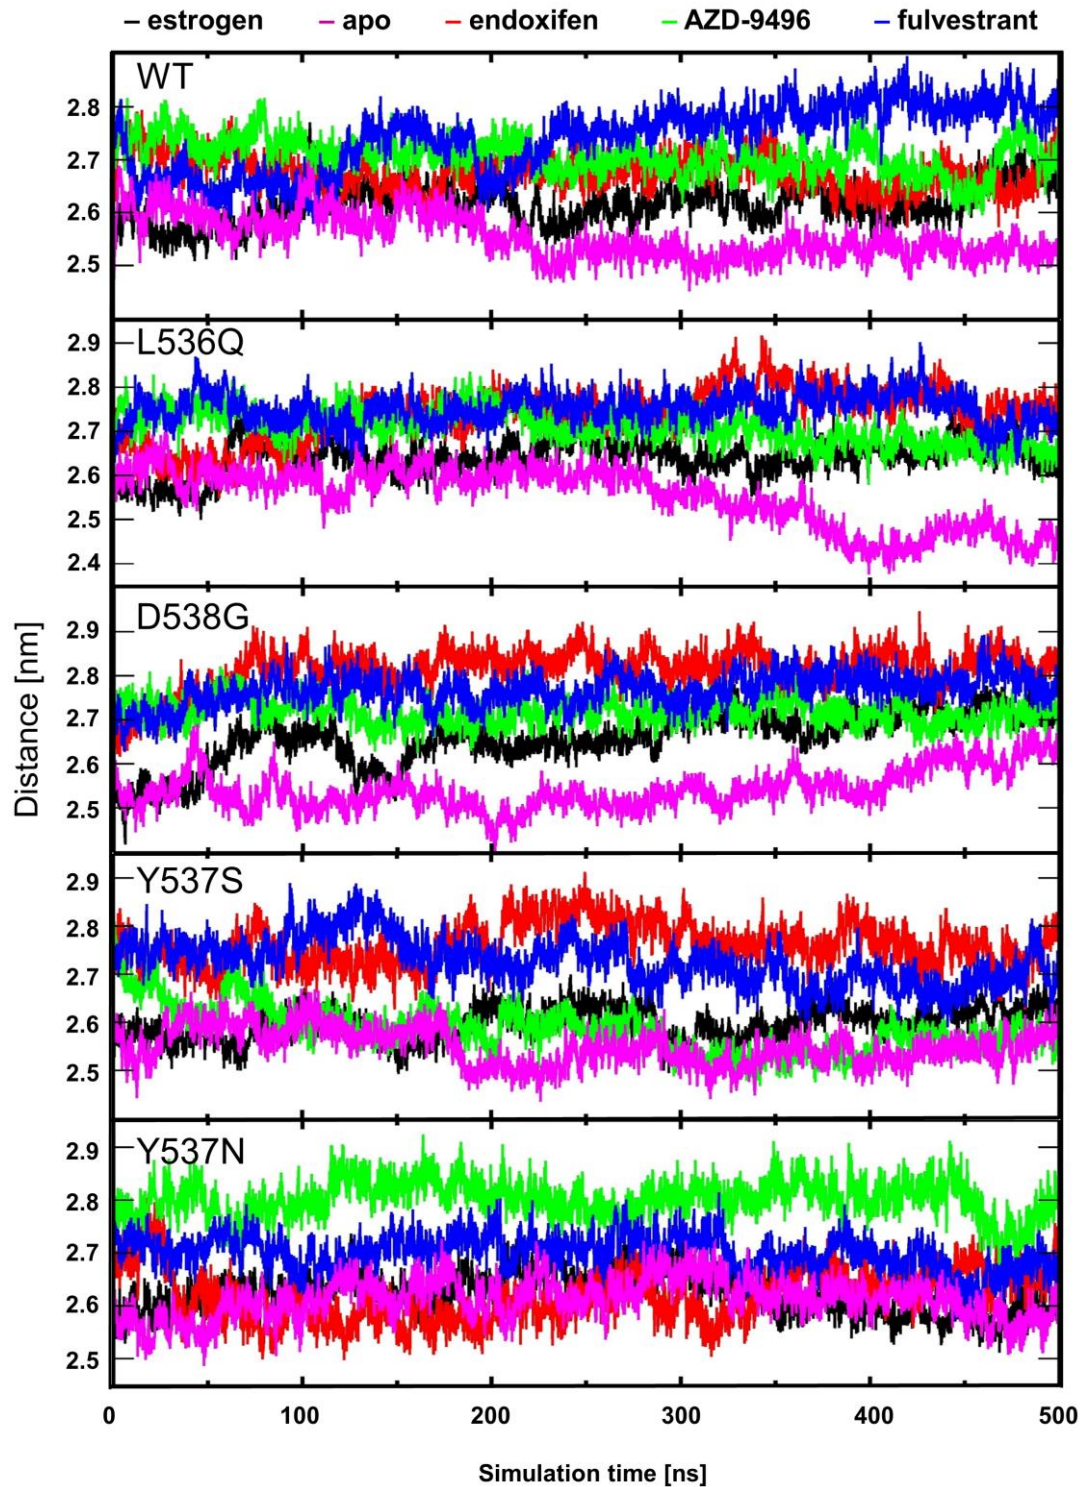

**Figure S3.** Distance (nm) between the centres of mass of monomers A and B of the LDB vs simulation time. WT ER $\alpha$  is plotted in black and mER $\alpha$ s are shown in red (L536Q), magenta (D538G), green (Y537S), and blue (Y537N).



Per residue RMS fluctuation of ER $\alpha$  dimer in complex with estrogen and in apo form

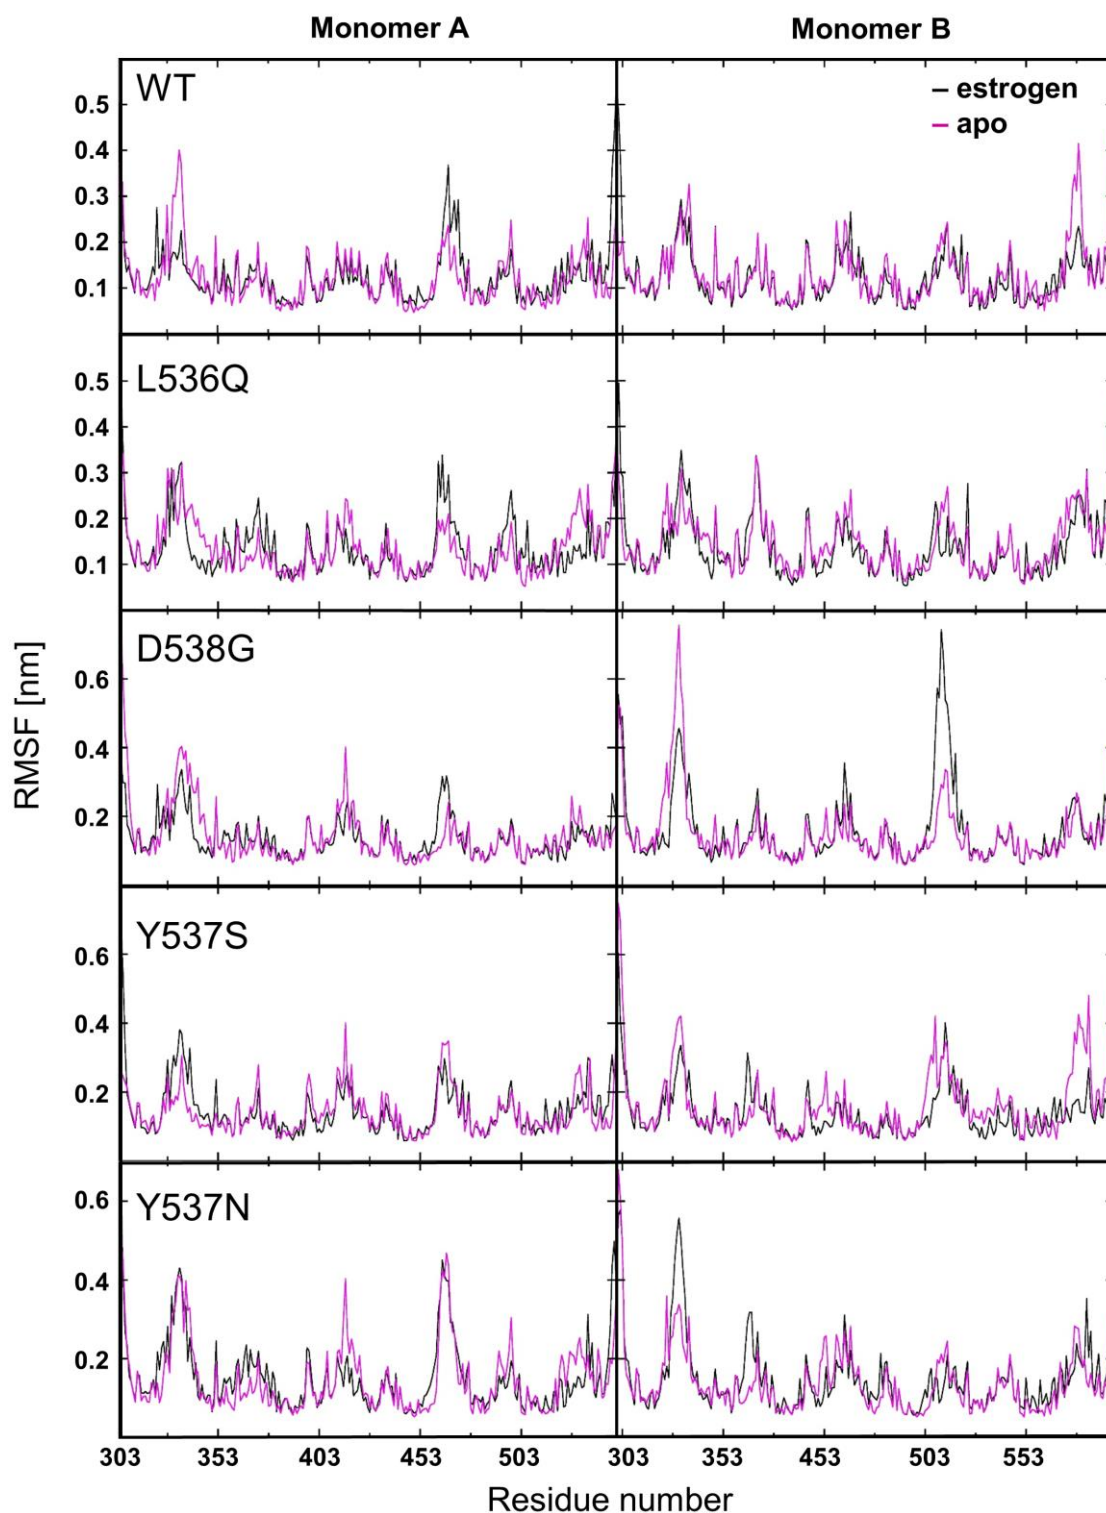

**Figure S4.** Per residue RMSF (nm) for the *apo* (magenta) and the estrogen-bound (black) form of the WT ER $\alpha$  and the four selected mER $\alpha$  polymorphisms (L536Q, D538G, Y537S, and Y537N), considering the receptor in the agonist state. Monomer A and B are shown on the left and right, respectively.

Per residue RMS fluctuation of ER $\alpha$  dimer in complex with endoxifen, AZD-9496 and fulvestrant

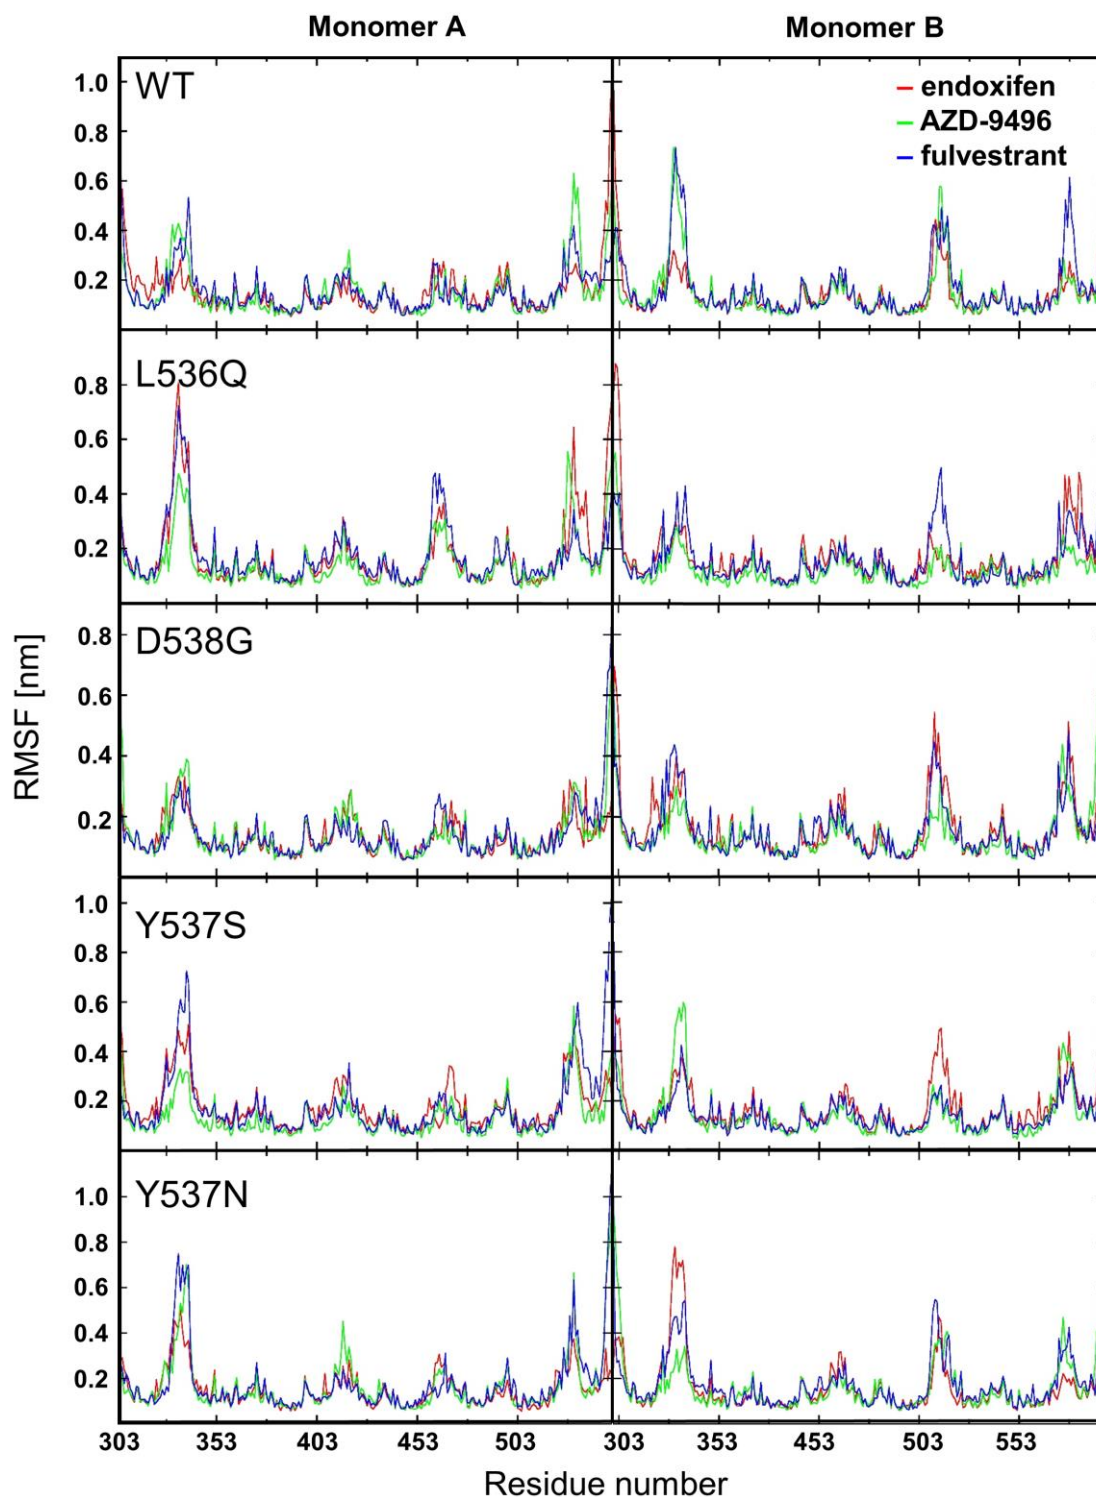

**Figure S5.** Per residue RMSF (nm) for the END-, AZD-9496-, and FULV-bound form of the WT ER $\alpha$  and the four selected mER $\alpha$  polymorphisms (L536G, Y537S, Y537N, D538G) from top to bottom, considering the receptor in the antagonist state. Monomer A and B are shown on the left and right, respectively.

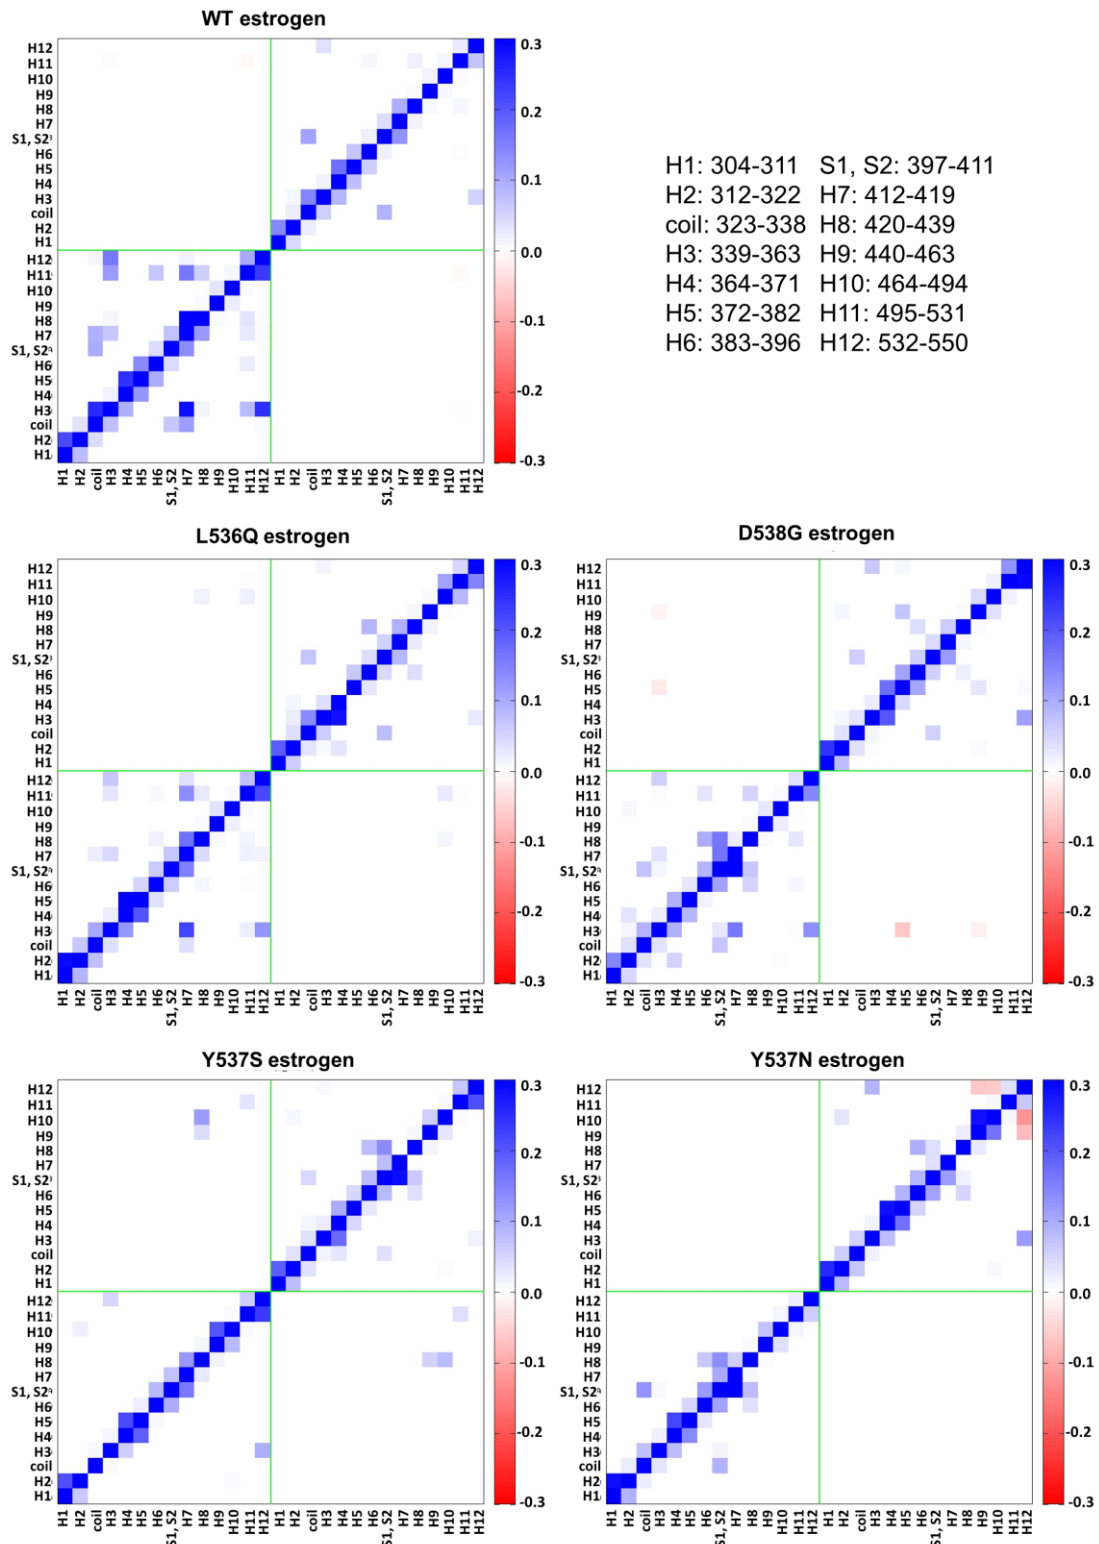

**Figure S6.** Cross-correlation maps of 14 regions (as defined in Fig. 1 of the main text) of both monomers of WT ER $\alpha$  and all mER $\alpha$ s in the *estrogen*-bound form. The cross-correlation coefficients, normalized by columns, are reported in the range from -0.3 to 0.3 due to clarity reasons. Blue and red colours account for positive and negative correlation. Top left is WT ER $\alpha$ , middle left L536Q ER $\alpha$ , middle right D538G ER $\alpha$ , bottom left Y537S ER $\alpha$  and bottom right Y537N ER $\alpha$ . Cross-correlation scores are reported in the range from -0.3 to 0.3 for clarity reasons. Blue and red colours account for positive and negative correlation, respectively.



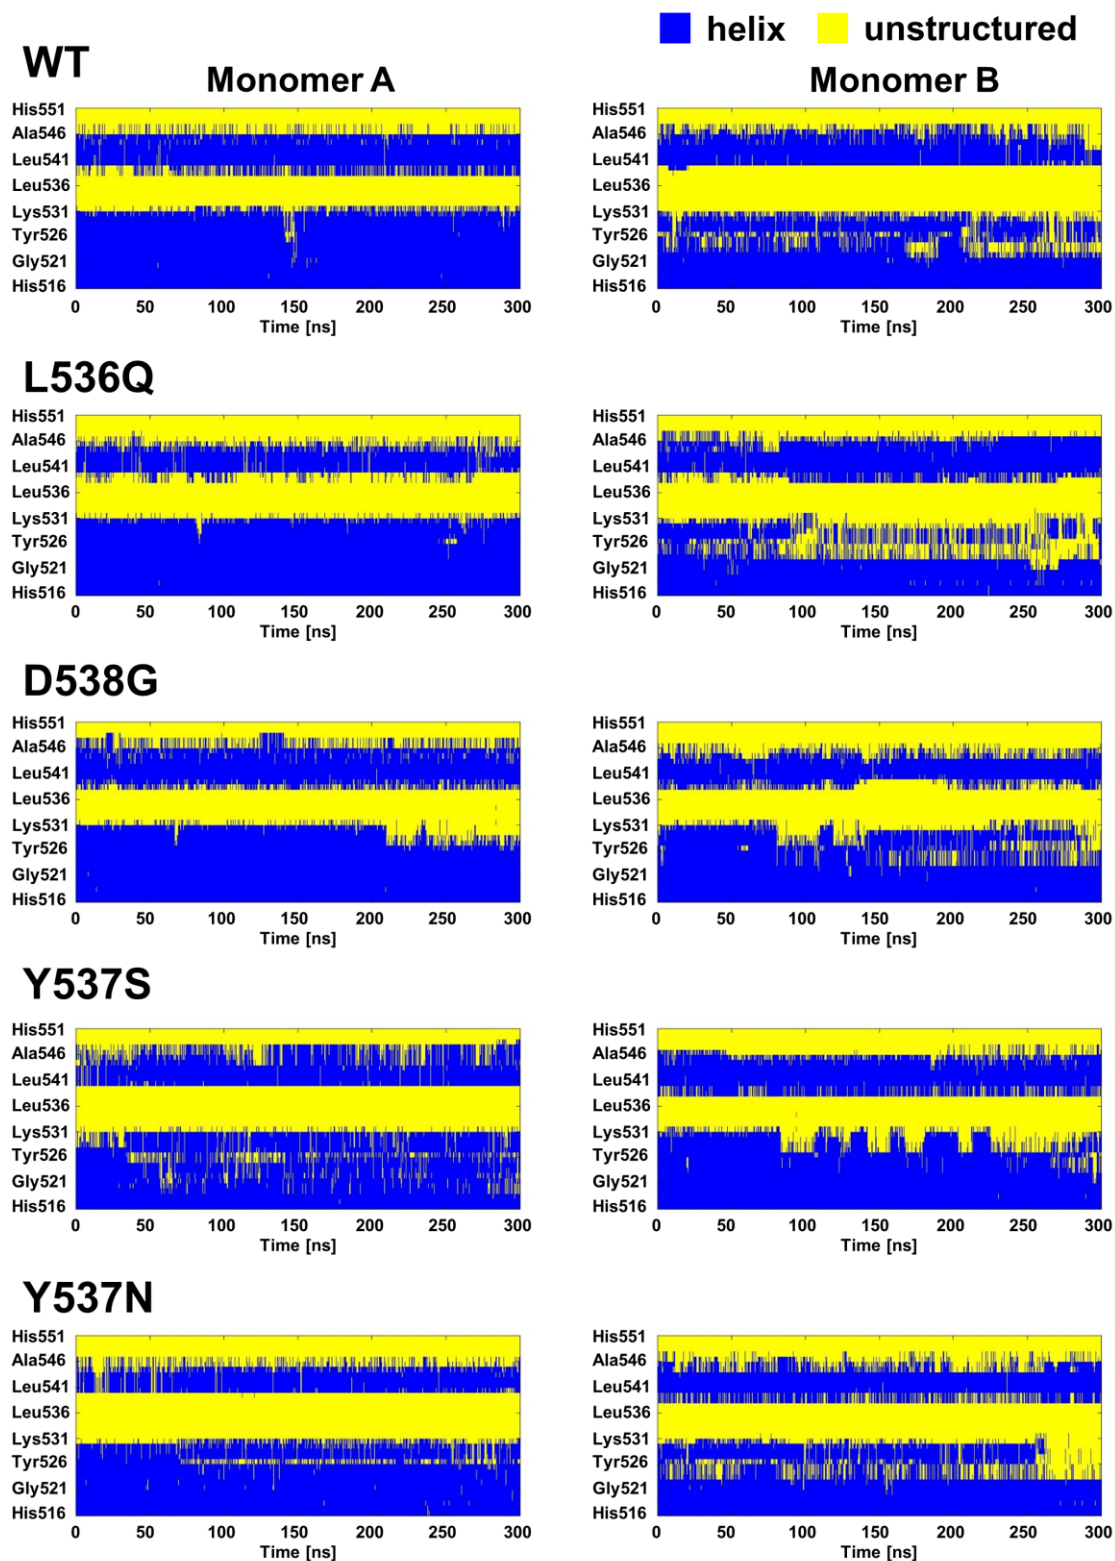

**Figure S7.** Secondary structure elements (colored in blue is helix and in yellow is unstructured part of the receptor) of the *apo* ER $\alpha$  (WT and all polymorphisms) for the last 35 residues of monomer A (left column) and B (right column), as calculated from the last 300 ns of MD simulations.

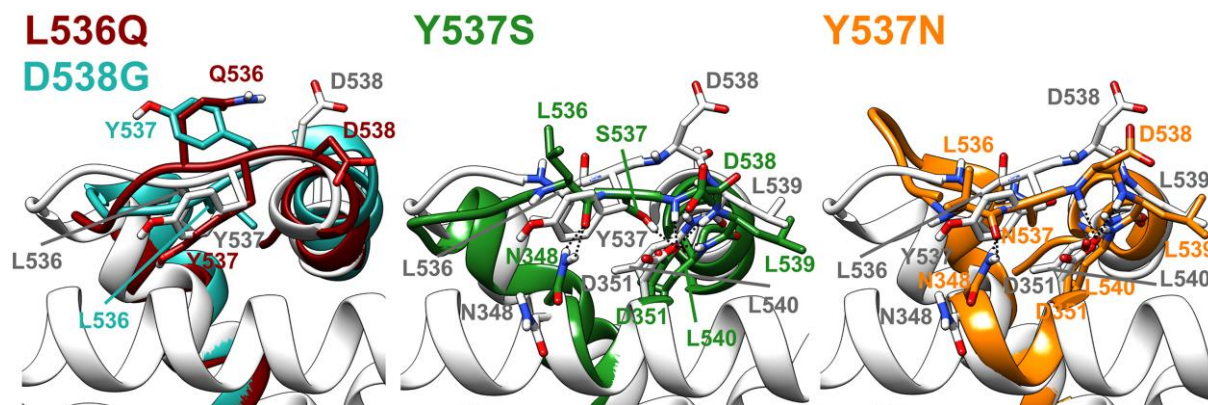

**Figure S8.** Interactions between the L11-12 and H3 for all *apo* mER $\alpha$ s (L536Q in dark red, D538G in turquoise, Y537S in green and Y537N in orange colour) in comparison with the WT ER $\alpha$  (white) in agonist state. Oxygen atoms are shown in red, nitrogen in blue and polar hydrogen atoms in white. Nonpolar hydrogen atoms are omitted for clarity. H-bonds are shown as dotted black lines. Structures of most populated cluster, obtained by the analyses of the last 300 ns simulations, for the ER $\alpha$  monomer A are shown.

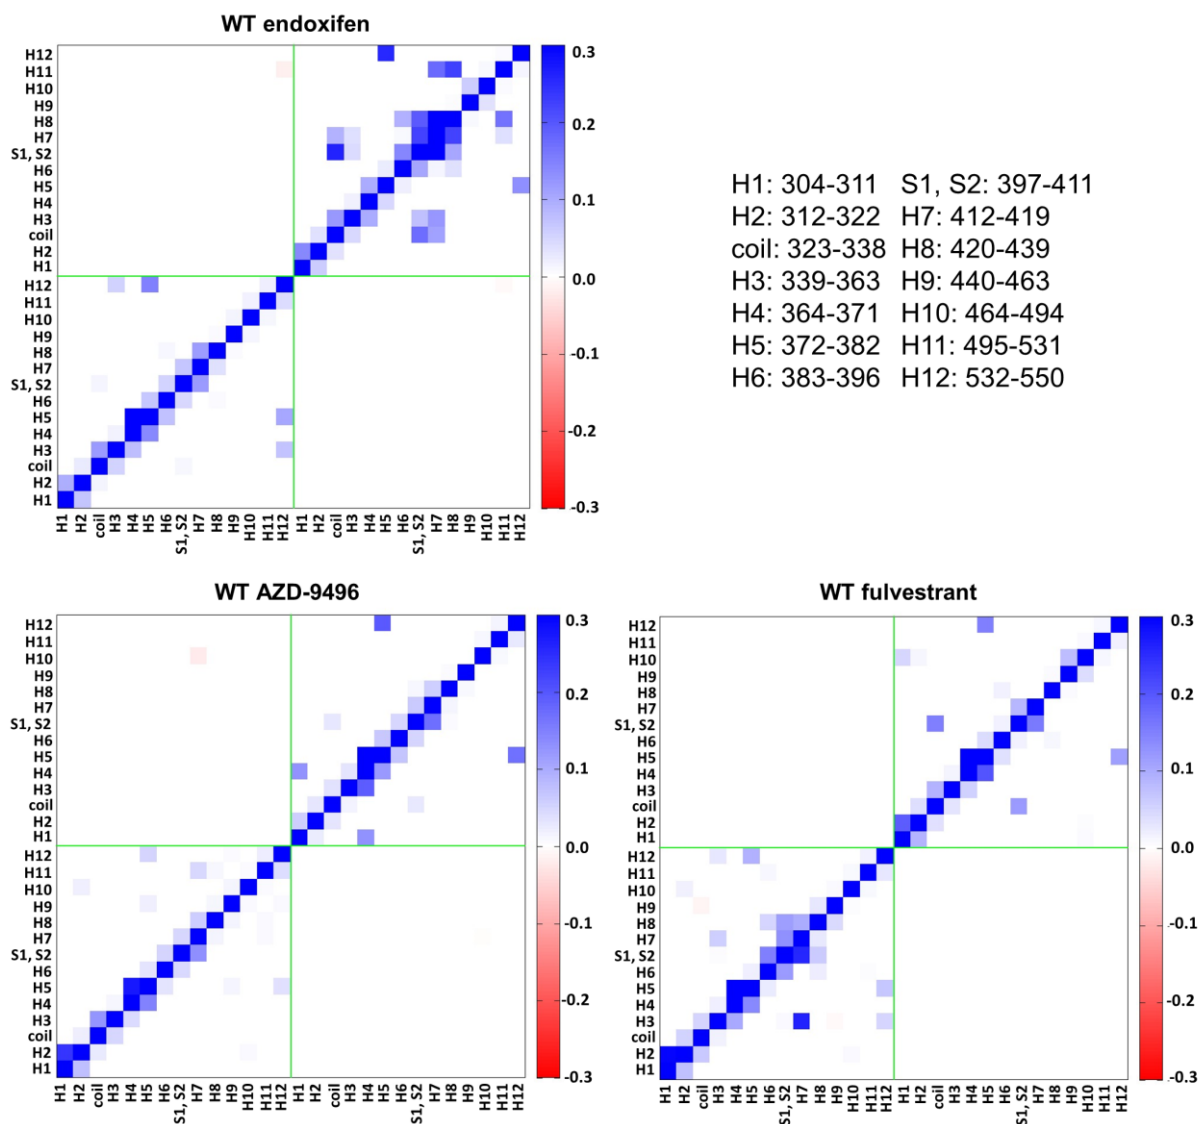

**Figure S9.** Per-column normalized cross-correlation maps of 14 regions (as defined in Fig. 1 of the main text) of both monomers of WT ER $\alpha$  in *antagonist*-bound form. The cross-correlation coefficients, normalized by columns, are reported in the range from -0.3 to 0.3 due to clarity reasons. Blue and red colours account for positive and negative correlation. Top left is END-bound ER $\alpha$ , bottom left AZD-9496-bound ER $\alpha$ , and bottom right FULV-bound ER $\alpha$ .

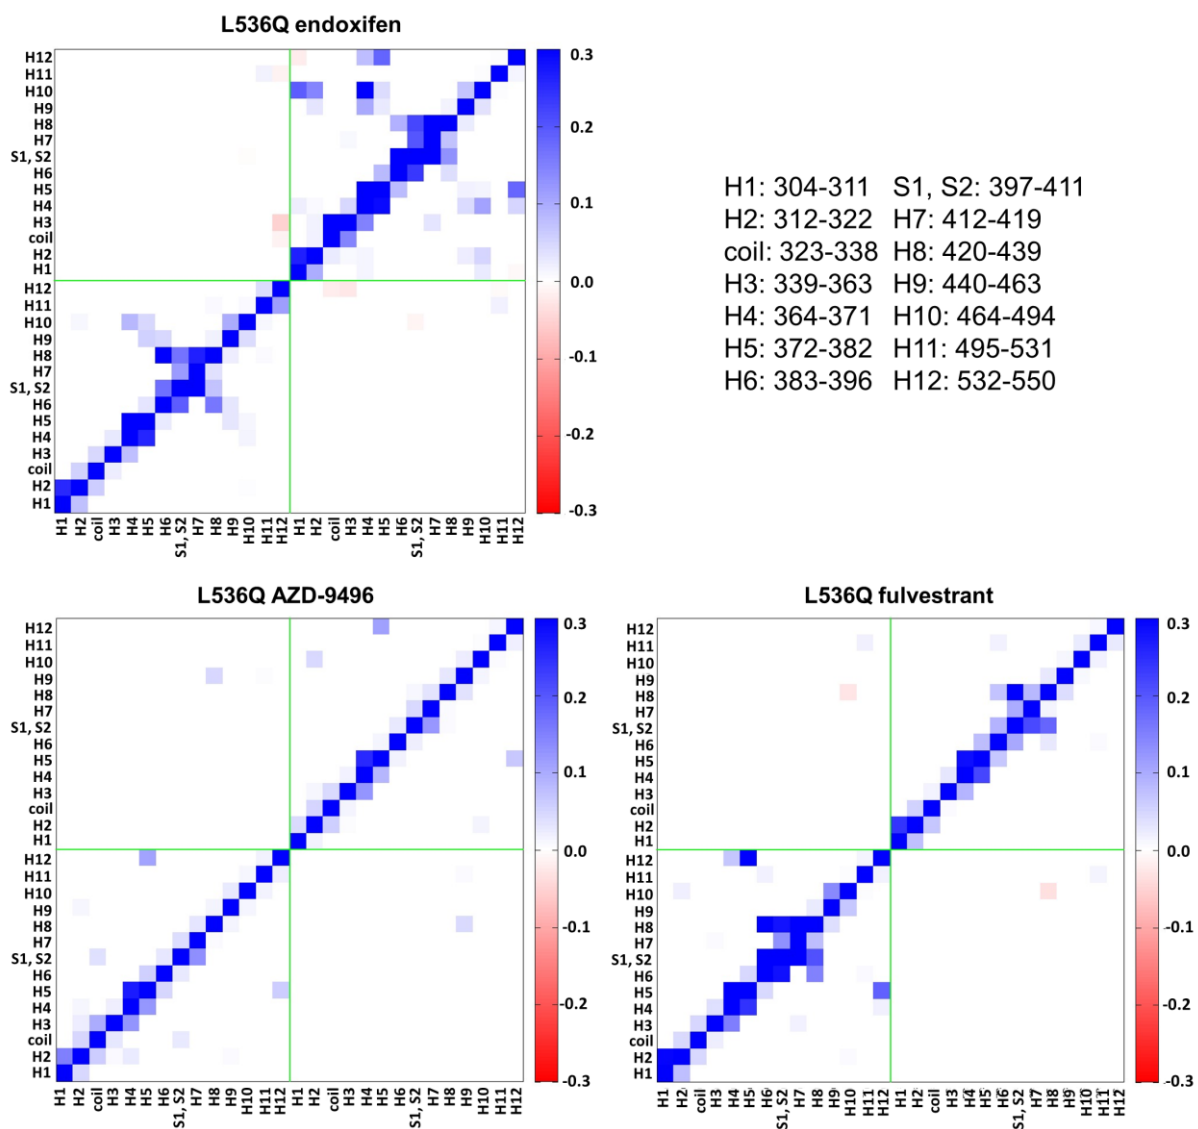

**Figure S10.** Per-column normalized cross-correlation maps of 14 regions (as defined in Fig. 1 of the main text) of both monomers of L536Q ER $\alpha$  in *antagonist*-bound form. The cross-correlation coefficients, normalized by columns, are reported in the range from -0.3 to 0.3 due to clarity reasons. Blue and red colours account for positive and negative correlation. Top left is END-bound ER $\alpha$ , bottom left AZD-9496-bound ER $\alpha$ , and bottom right FULV-bound ER $\alpha$ .

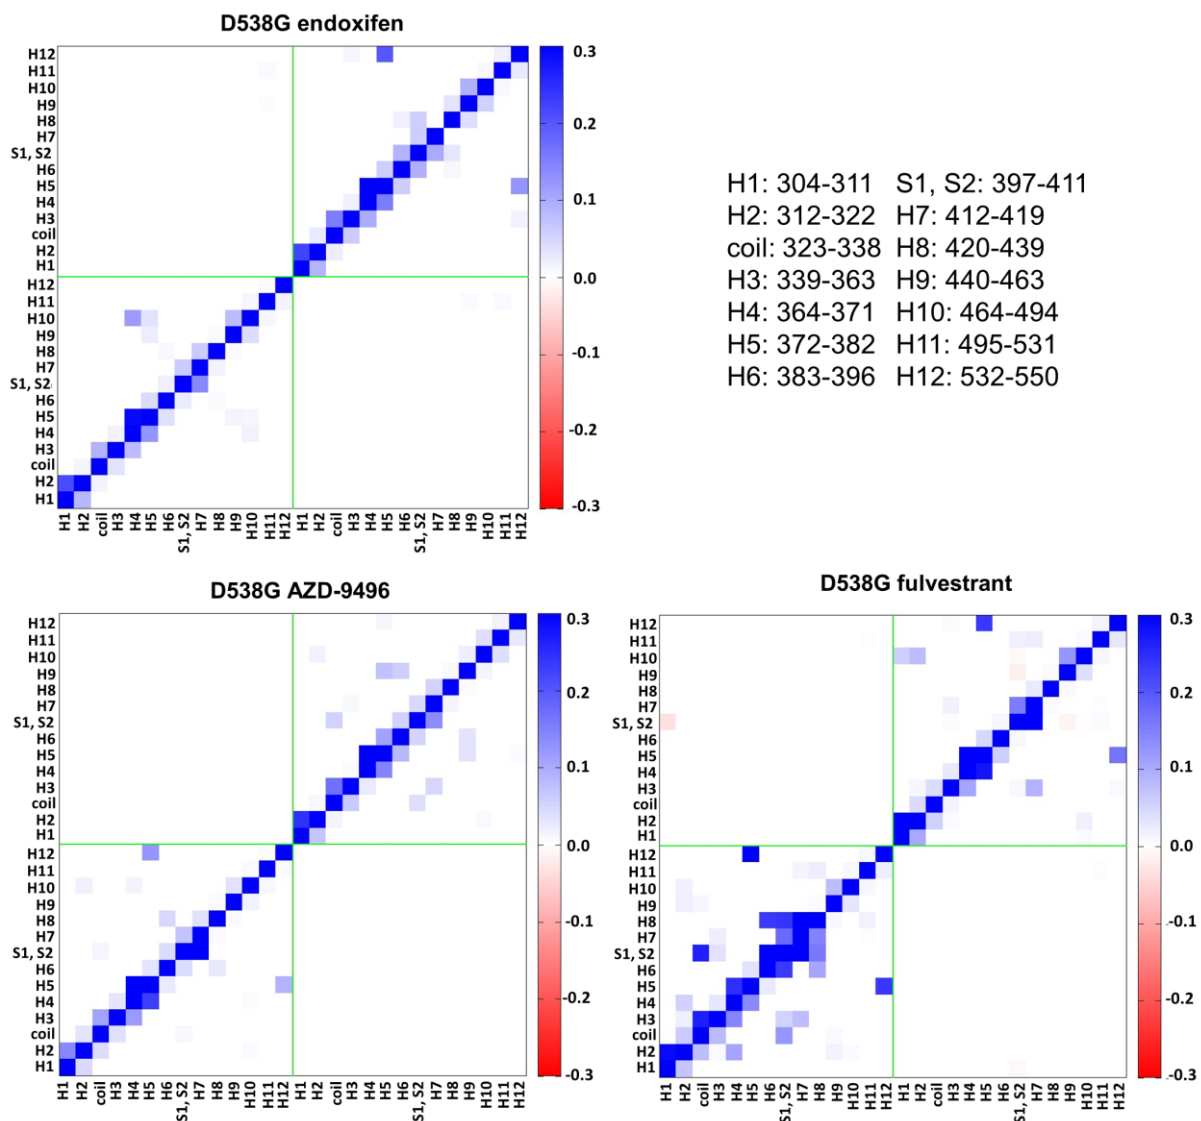

**Figure S11.** Per-column normalized cross-correlation maps of 14 regions (as defined in Fig. 1 of the main text) of both monomers of D538G ER $\alpha$  in *antagonist*-bound form. The cross-correlation coefficients, normalized by columns, are reported in the range from -0.3 to 0.3 due to clarity reasons. Blue and red colours account for positive and negative correlation. Top left is END-bound ER $\alpha$ , bottom left AZD-9496-bound ER $\alpha$ , and bottom right FULV-bound ER $\alpha$ .



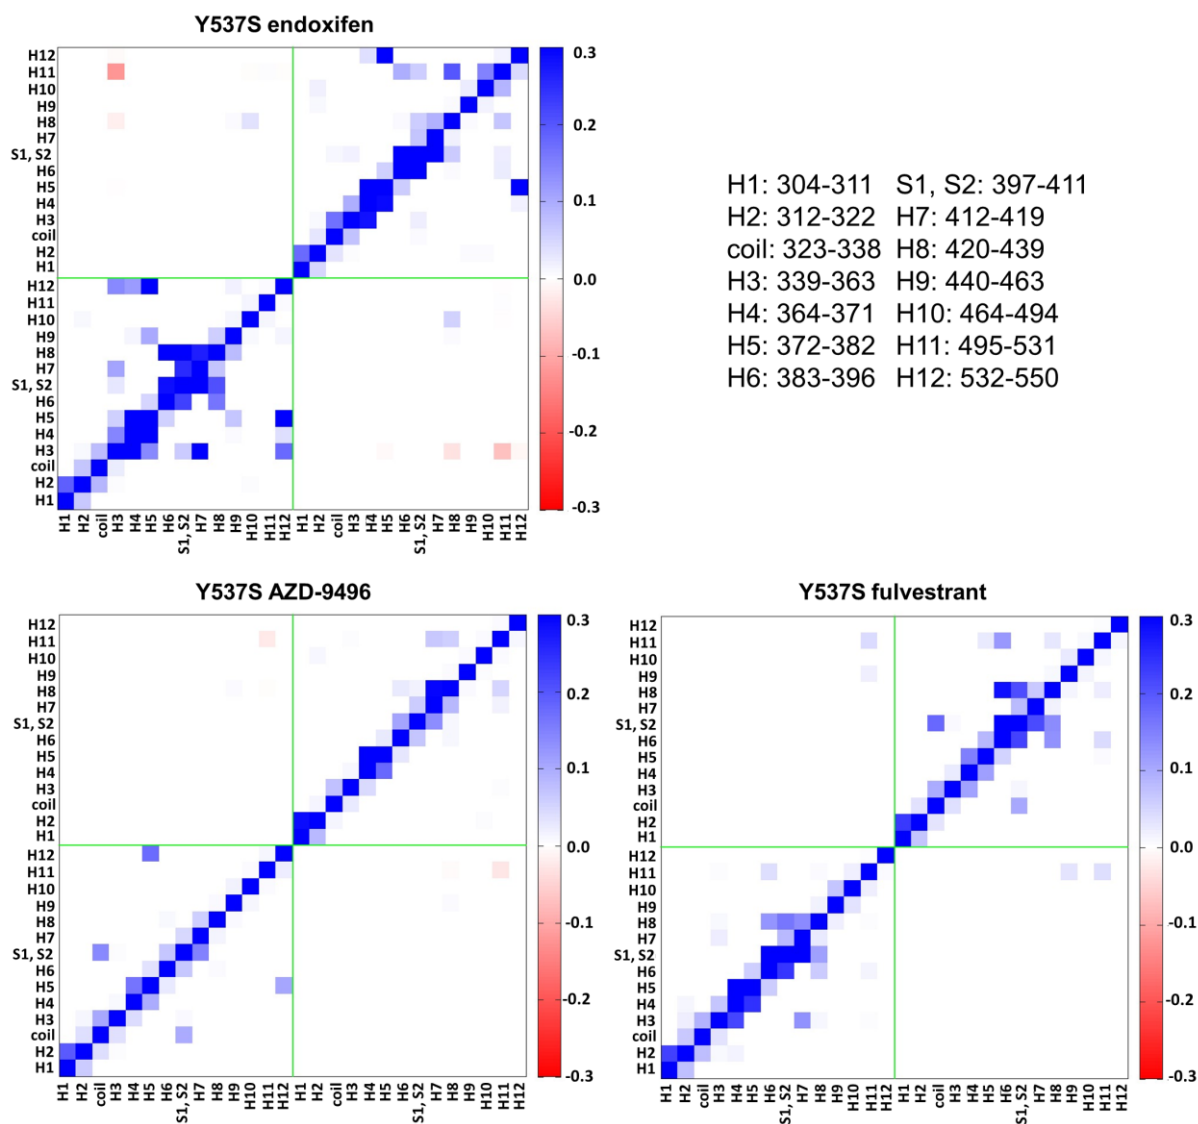

**Figure S12.** Per-column normalized cross-correlation maps of 14 regions (as defined in Fig. 1 of the main text) of both monomers of Y537S ER $\alpha$  in *antagonist*-bound form. The cross-correlation coefficients, normalized by columns, are reported in the range from -0.3 to 0.3 due to clarity reasons. Blue and red colours account for positive and negative correlation. Top left is END-bound ER $\alpha$ , bottom left AZD-9496-bound ER $\alpha$ , and bottom right FULV-bound ER $\alpha$ .

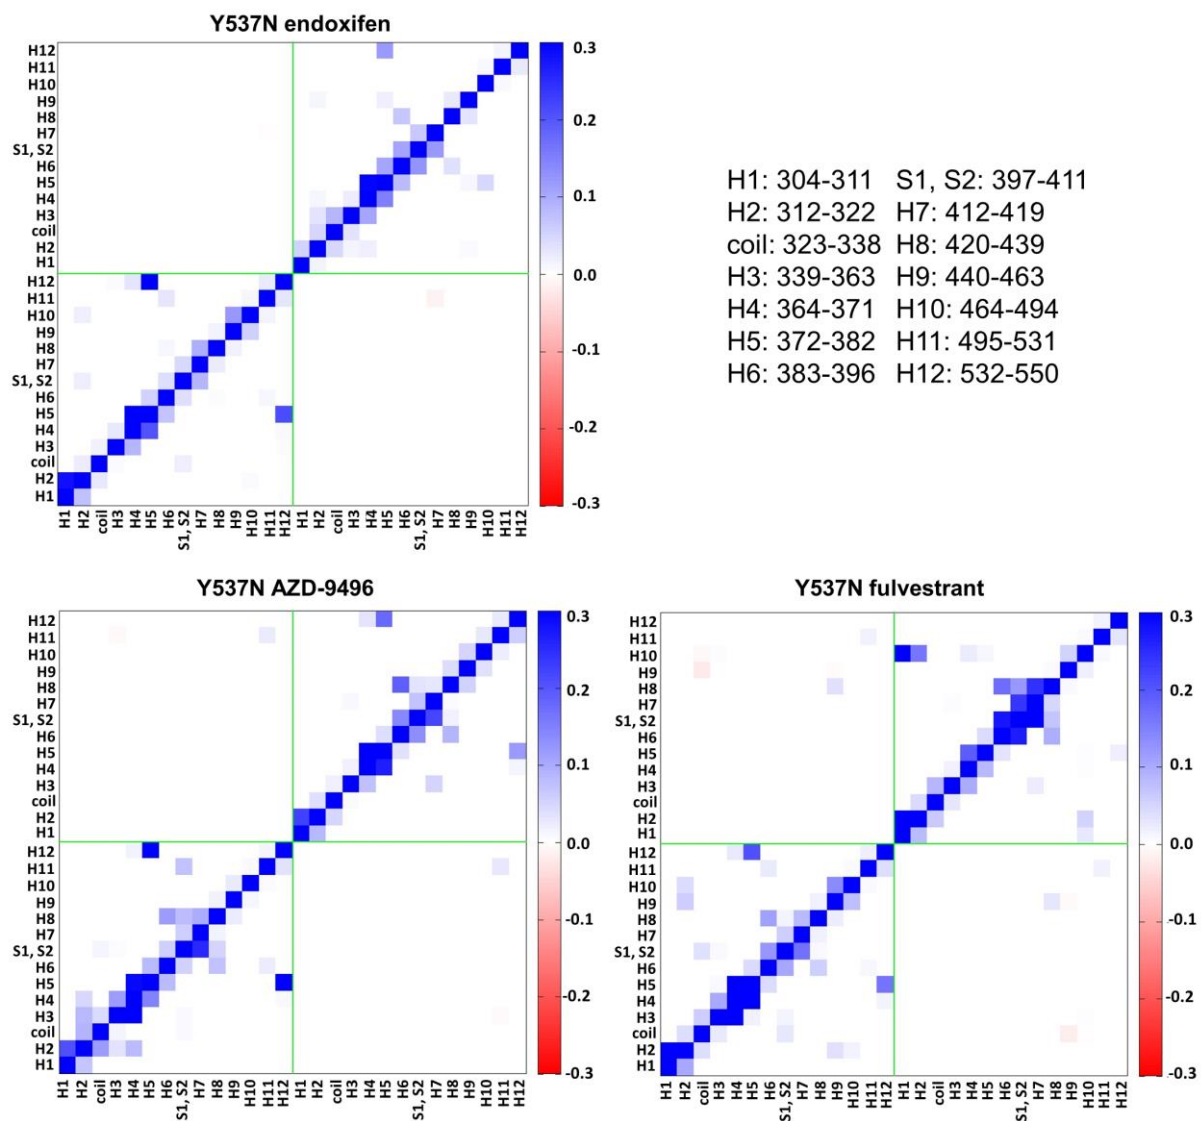

**Figure S13.** Per-column normalized cross-correlation maps of 14 regions (as defined in Fig. 1 of the main text) of both monomers of Y537N ER $\alpha$  in *antagonist*-bound form. The cross-correlation coefficients, normalized by columns, are reported in the range from -0.3 to 0.3 due to clarity reasons. Blue and red colours account for positive and negative correlation. Top left is END-bound ER $\alpha$ , bottom left AZD-9496-bound ER $\alpha$ , and bottom right FULV-bound ER $\alpha$ .

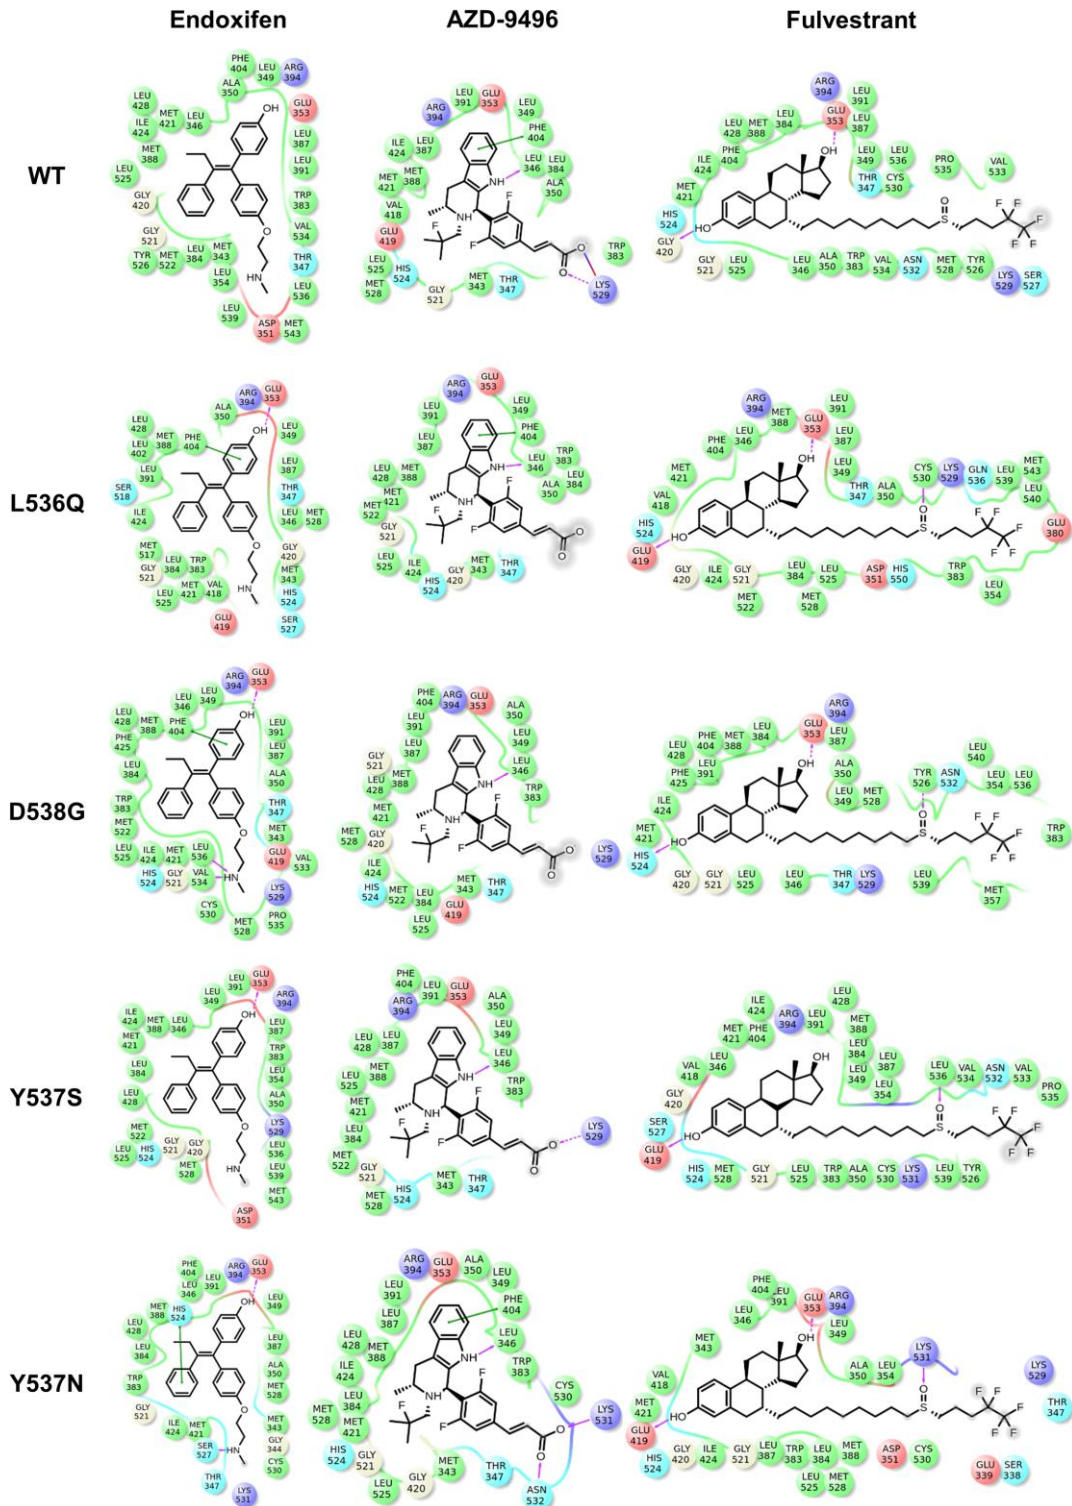

**Figure S14a.** 2D interaction maps of antagonists inside the binding pocket of ER $\alpha$  (monomer A). Green colour represents hydrophobic interactions, blue and red represent ionic interactions (negatively charged residues are coloured in red and positively charged in dark blue, respectively) and turquoise colour represents polar interactions. Glycines are coloured in bright yellow. Full magenta lines represent hydrogen bonds with the residues' backbone and the dashed magenta lines represent hydrogen bonds with the residues' side chains. Green lines show  $\pi$ - $\pi$  interactions.



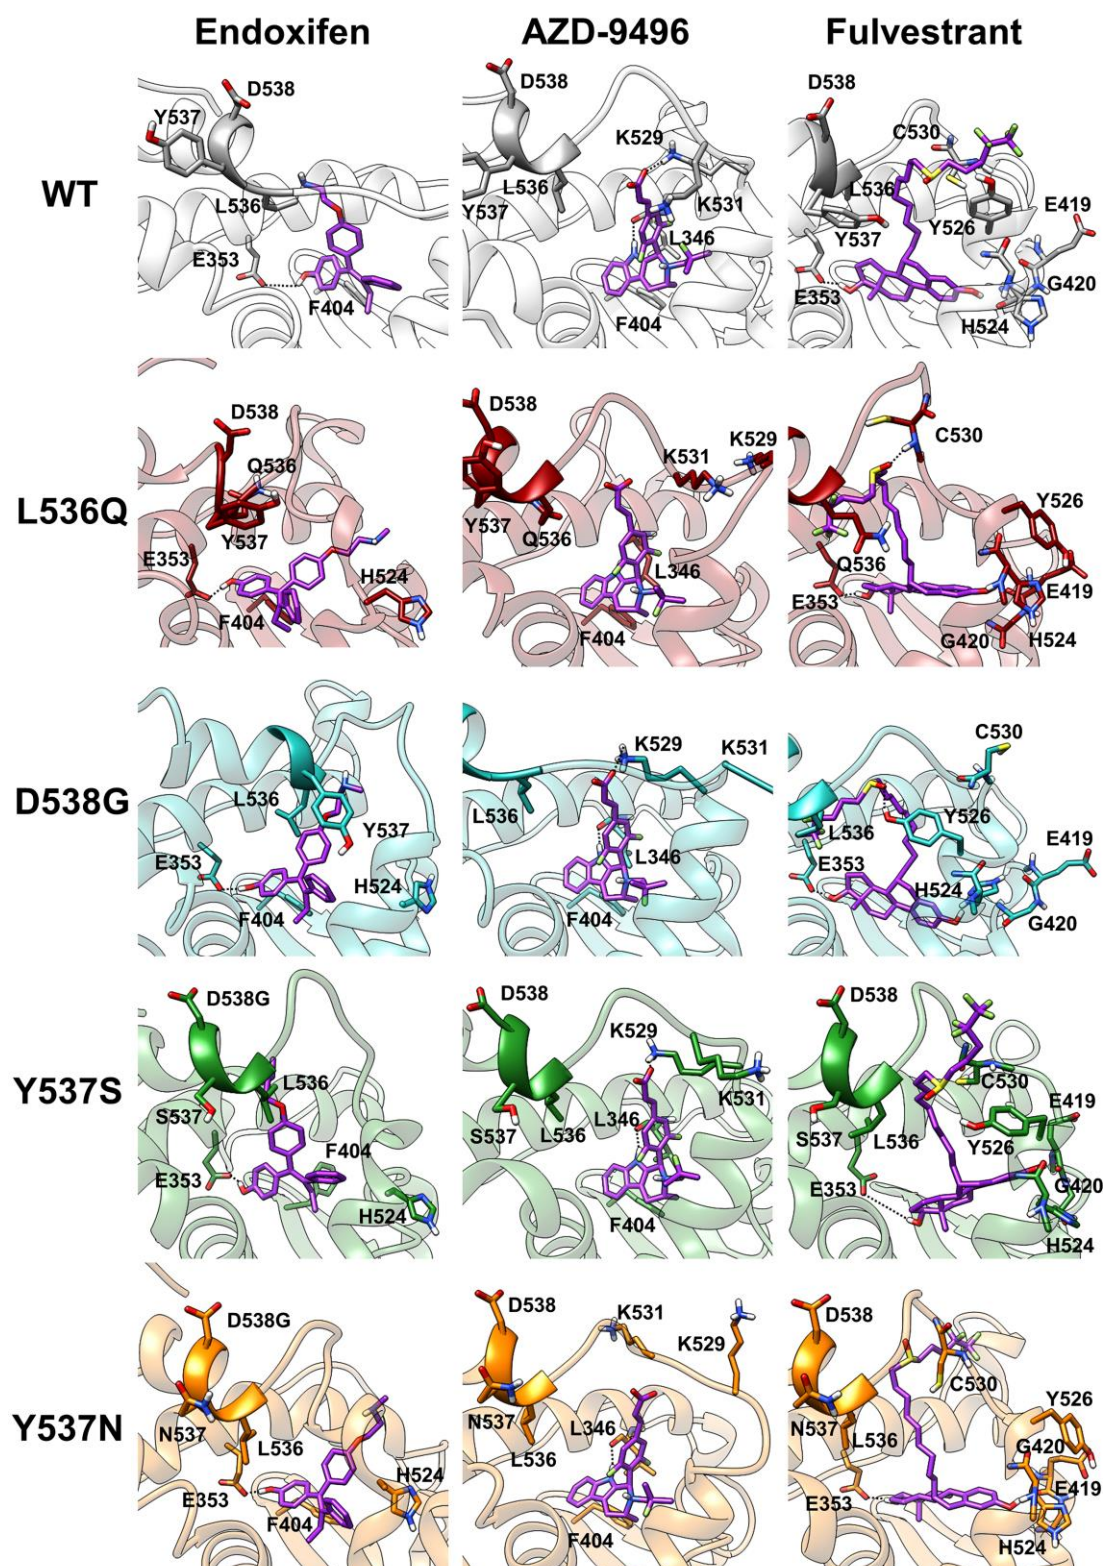

**Figure 14b.** Interaction network of antagonists with the ER $\alpha$ . Complexes with endoxifen, AZD-9496 and fulvestrant are reported in the first, the second and the third columns, respectively. WT (white) ER $\alpha$  and L536Q (dark red), D538G (turquoise), Y537S (green), and Y537N (orange) mERAs are reported from the top to the bottom rows. Endoxifen, AZD-9496, and fulvestrant are coloured in violet. H-bonds are shown as dotted black lines. Oxygen, nitrogen, and hydrogen atoms are depicted in red, blue, and white, respectively. The structures depict the highest populated clusters of monomer A as obtained from the clustering analysis.

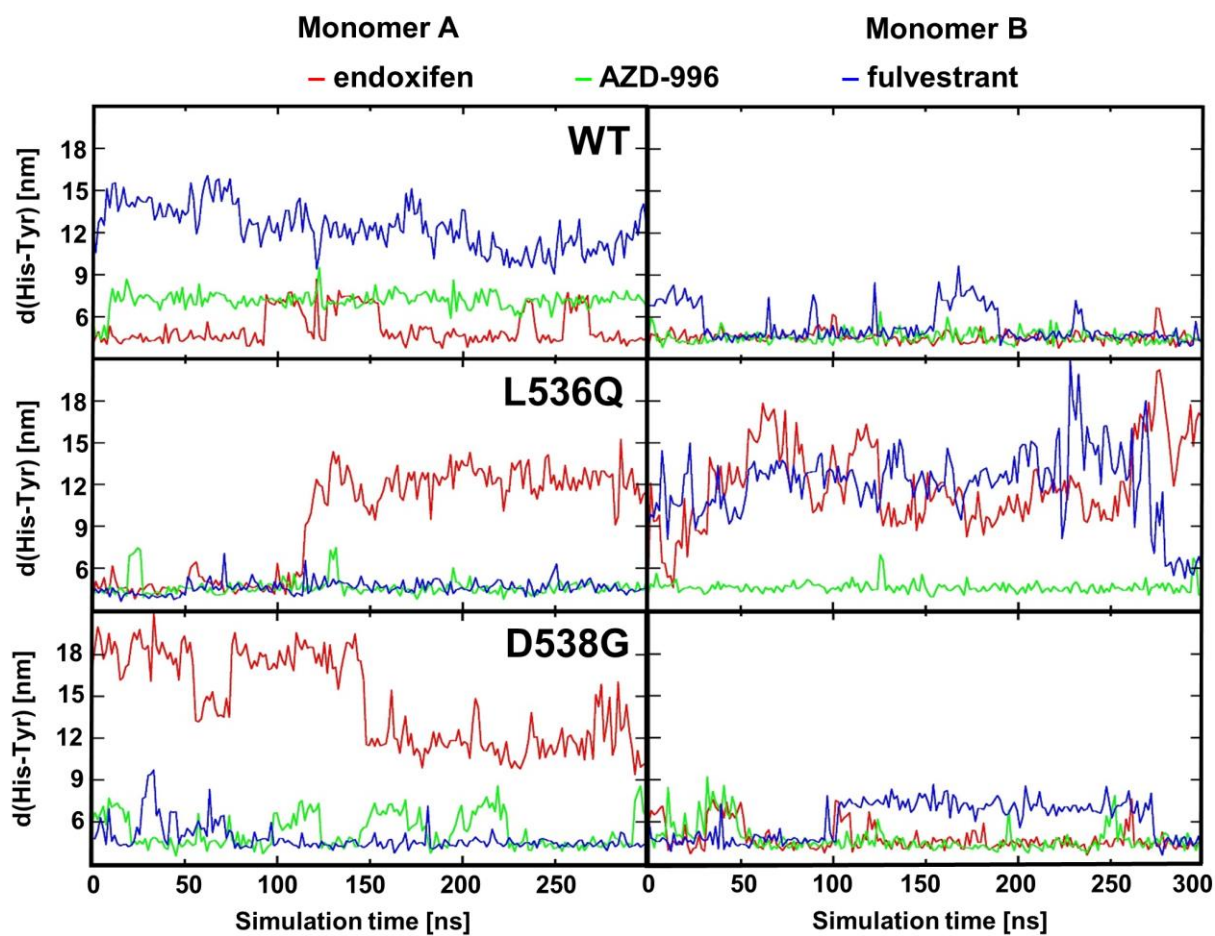

**Figure S15.** Distance between center of mass of Y537 and H377 rings for the analyzed 300 ns of classical MD simulations. Monomer A and B are shown in the left and right columns, respectively. END-, AZD-9496-, and FULV-bound complexes are shown in red, green, and blue, respectively.



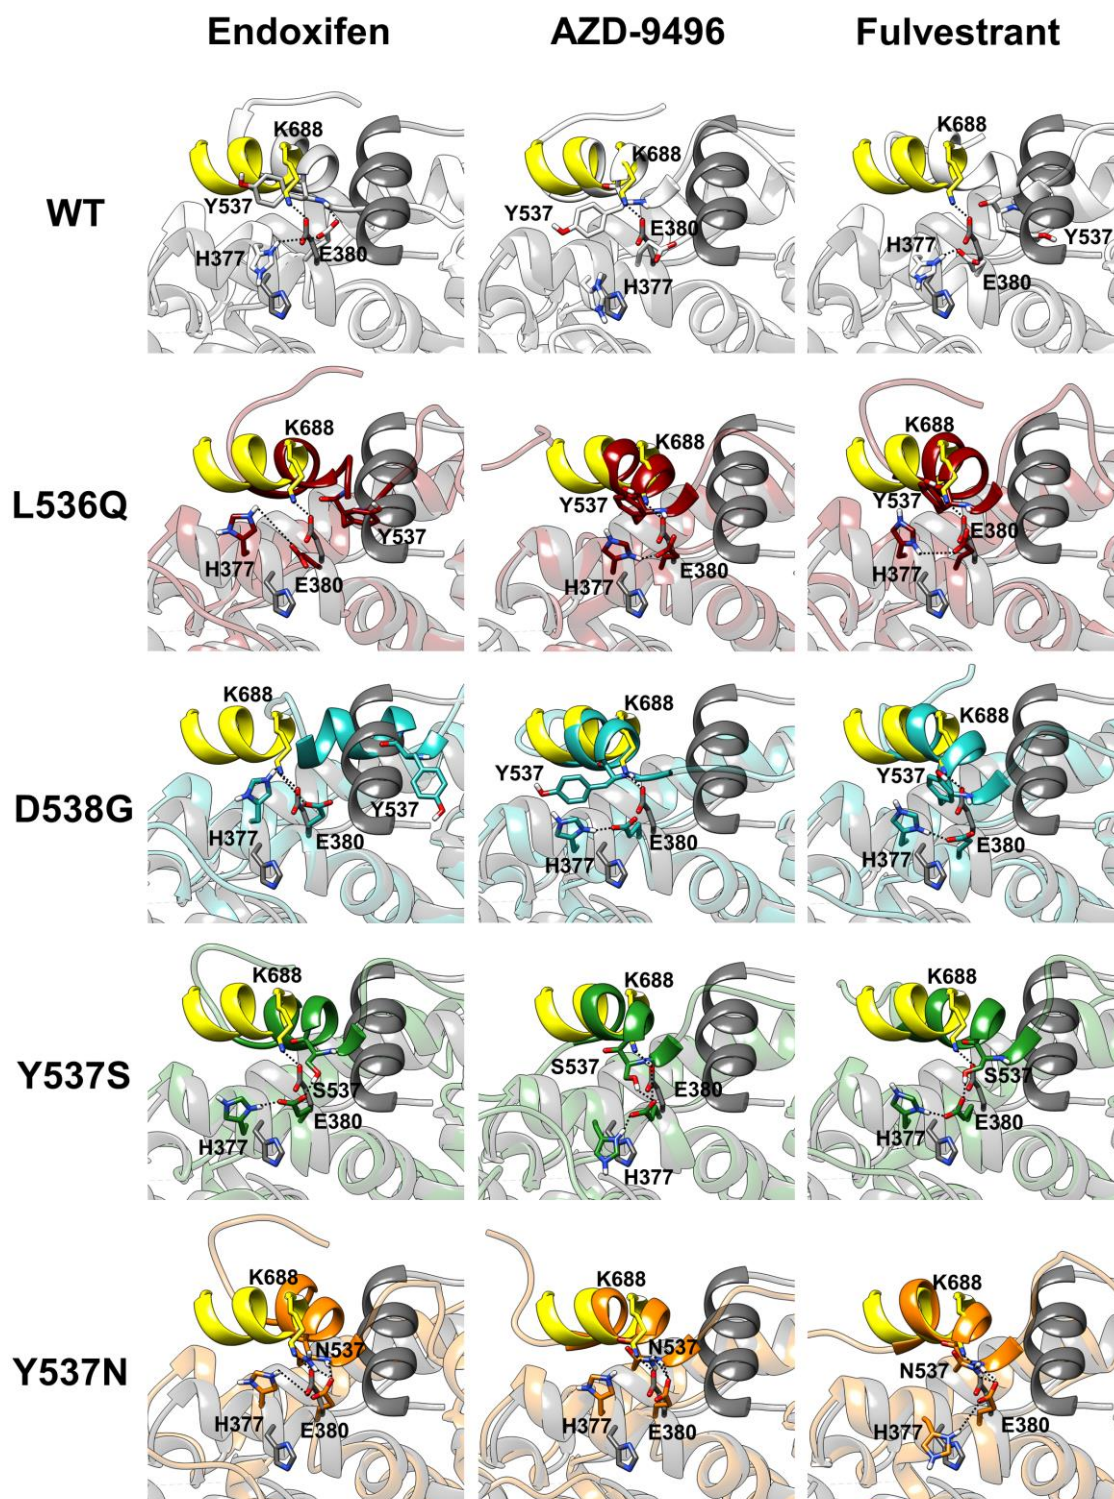

**Figure S16.** Most representative clusters obtained from the clustering analysis of separate antagonist-bound ER $\alpha$  monomers superimposed on the crystal structure of agonist-bound ER $\alpha$  (dark grey), with the coactivator protein located in the groove between H3 and H5 (yellow). In first column are END-bound complexes, in second AZD-9496-bound and in third FULV-bound ones. From the top to the bottom row WT (white) ER $\alpha$ , L536Q (dark red), D538G (turquoise), Y537S (green), and Y537N (orange) are shown. Hydrogen bonds are shown as dotted black lines. Oxygen, nitrogen, and hydrogen atoms are coloured in red, blue, and white, respectively. Only monomer A of each complex is shown.

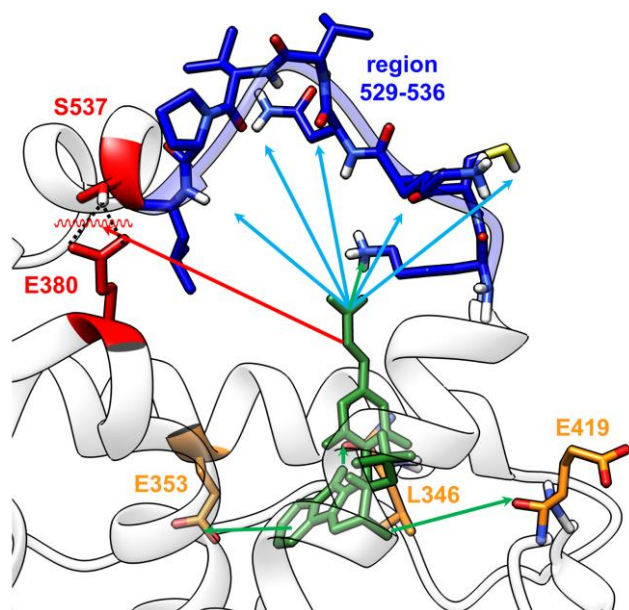

**Figure S17.** Regions of ER $\alpha$  that should be targeted by novel drugs effectively locking the antagonist mER $\alpha$ s. These should H-bond with the region 529-537 (blue), break H-bond between E380 and S/N537 (red) and form H-bonds with L346, E353 and E419 (orange) belonging to the ER $\alpha$  binding site. Figure is based on the highest populated cluster of Y537S ER $\alpha$  monomer A (white) with AZD-9496 (green) inside the binding site.

### 3. Supporting Tables

**Table S1.** Distribution of the highest populated cluster and first four highest populated clusters from the last 300 ns of classical MD simulations based the cut-off value of 0.275 nm. First and second columns of each section refer to monomer A and B, respectively.

|              | 1 <sup>st</sup> cluster |       | Total number of clusters |   |
|--------------|-------------------------|-------|--------------------------|---|
| <b>WT</b>    |                         |       |                          |   |
| Estrogen     | 100%                    | 100%  | 1                        | 1 |
| Apo          | 100%                    | 100%  | 1                        | 1 |
| Endoxifen    | 93.4%                   | 95.1% | 4                        | 4 |
| AZD-9496     | 98.9%                   | 86.7% | 3                        | 3 |
| fulvestrant  | 100%                    | 78.7% | 1                        | 5 |
| <b>L536Q</b> |                         |       |                          |   |
| Estrogen     | 100%                    | 100%  | 1                        | 1 |
| Apo          | 100%                    | 100%  | 1                        | 1 |
| Endoxifen    | 57.3%                   | 69.6% | 5                        | 4 |
| AZD-9496     | 95.0%                   | 100%  | 3                        | 1 |
| fulvestrant  | 80.1%                   | 84.9% | 5                        | 3 |
| <b>D538G</b> |                         |       |                          |   |
| Estrogen     | 100%                    | 100%  | 1                        | 1 |
| Apo          | 100%                    | 98.6% | 1                        | 4 |
| Endoxifen    | 100%                    | 96.5% | 1                        | 4 |
| AZD-9496     | 99.9%                   | 99.6% | 2                        | 2 |
| fulvestrant  | 98.7%                   | 100%  | 3                        | 1 |
| <b>Y537S</b> |                         |       |                          |   |
| Estrogen     | 99.9%                   | 98.1% | 2                        | 3 |
| Apo          | 98.9%                   | 100%  | 3                        | 1 |
| Endoxifen    | 84.7%                   | 97.1% | 4                        | 4 |
| AZD-9496     | 100%                    | 99.9% | 1                        | 2 |
| fulvestrant  | 57.6%                   | 100%  | 7                        | 1 |
| <b>Y537N</b> |                         |       |                          |   |
| Estrogen     | 100%                    | 98.0% | 1                        | 2 |
| Apo          | 99.1%                   | 97.4% | 3                        | 3 |
| Endoxifen    | 99.8%                   | 65.9% | 2                        | 4 |
| AZD-9496     | 71.6%                   | 73.0% | 4                        | 3 |
| fulvestrant  | 53.8%                   | 61.4% | 9                        | 7 |

**Table S2.** H-bond occurrence (%) between H3 residues (N348 and D351) and L11-12 residues (L536, Y/S/N537 – named Mut537, D538, L539, and L540) during the last 300 ns of MD simulation. First and second columns of each section refer to monomer A and B, respectively.

|          | N348 – L536<br>(Nδ2-H2···O) |                   | N351 – Mut537<br>(Oδ1/Oδ2···H-Oη (Tyr)) <sup>a</sup><br>(Oδ1/Oδ2···H-Oγ (Ser)) <sup>b</sup><br>(Oδ1/Oδ2···H2-Nδ2 (Asn)) <sup>c</sup><br>(Oδ1/Oδ2···H-N) <sup>d</sup> |                                            | D351 – N538<br>(Oδ1/Oδ2···H-N) |                      | D351 – L539<br>(Oδ1/Oδ2···H-N) |       | D351 – L540<br>(Oδ1/Oδ2···H-N) |       |
|----------|-----------------------------|-------------------|----------------------------------------------------------------------------------------------------------------------------------------------------------------------|--------------------------------------------|--------------------------------|----------------------|--------------------------------|-------|--------------------------------|-------|
| WT       |                             |                   |                                                                                                                                                                      |                                            |                                |                      |                                |       |                                |       |
| apo      |                             | 18.6%             |                                                                                                                                                                      |                                            |                                | 96.0%                |                                | 88.5% |                                | 92.4% |
| estrogen |                             |                   |                                                                                                                                                                      |                                            |                                |                      | 3.3%                           | 10.8% | 6.2%                           | 13.7% |
| L536Q    |                             |                   |                                                                                                                                                                      |                                            |                                |                      |                                |       |                                |       |
| apo      |                             |                   |                                                                                                                                                                      |                                            | 10.9%                          |                      | 10.7%                          |       | 11.7%                          |       |
| estrogen |                             | 3.0% <sup>z</sup> |                                                                                                                                                                      |                                            |                                | 46.0%                | 11.0%                          | 73.2% | 13.7%                          | 80.9% |
| D538G    |                             |                   |                                                                                                                                                                      |                                            |                                |                      |                                |       |                                |       |
| apo      |                             |                   | 6.1% <sup>a</sup>                                                                                                                                                    | 1.8% <sup>a</sup><br>26.3% <sup>d</sup>    | ***                            | 10.0% <sup>***</sup> |                                | 0.3%  |                                | 2.4%  |
| estrogen |                             |                   |                                                                                                                                                                      |                                            | 25.3% <sup>***</sup>           | ***                  | 36.8%                          | 33.4% | 46.6%                          | 86.4% |
| Y537S    |                             |                   |                                                                                                                                                                      |                                            |                                |                      |                                |       |                                |       |
| apo      | 57.1%                       |                   | 63.6% <sup>b</sup>                                                                                                                                                   | 85.6% <sup>b</sup>                         | 99.4%                          |                      | 89.1%                          |       | 91.3%                          |       |
| estrogen | 23.7%                       | 16.8%             | 10.3% <sup>b</sup>                                                                                                                                                   | 38.0% <sup>b</sup><br>1.6% <sup>d</sup>    | 85.3%                          | 73.7%                | 67.6%                          | 60.0% | 91.8%                          | 73.7% |
| Y537N    |                             |                   |                                                                                                                                                                      |                                            |                                |                      |                                |       |                                |       |
| apo      | 81.9%                       |                   |                                                                                                                                                                      | 79.3% <sup>c</sup><br>54.6% <sup>d**</sup> | 105.6%                         |                      | 92.3%                          |       | 88.3%                          |       |
| estrogen |                             | 89.8%             | 80.5% <sup>c</sup>                                                                                                                                                   |                                            |                                | 105.8%               |                                | 93.5% |                                | 81.8% |

<sup>z</sup>Here L536 is mutated to Q536.

<sup>\*\*</sup>Additional hydrogen bond is formed between R351 and R335 (Oδ1/Oδ2···H2-Nη1/Nη2) with occurrence of 43.7%.

<sup>\*\*\*</sup>Here D538 is mutated to G538.

**Table S3.** Occurrence of selected H-bonds (%) between H5 (H377 and E380) and H12 (L536, Y/S/N537 – named Mut537, and L540 along the last 300 ns of MD simulation.

|             | L536 – L540<br>(O···H-N) |          | E380 – Mut537<br>(Oε1/Oε2···H-N) |       | E380 – Mut537<br>(Oε1/Oε2···H-Nδ2/H-O) |        | E380 – H377<br>(Oε1/Oε2···H-Nδ1) |       |
|-------------|--------------------------|----------|----------------------------------|-------|----------------------------------------|--------|----------------------------------|-------|
| WT          |                          |          |                                  |       |                                        |        |                                  |       |
| Endoxifen   | 81.7%                    | 73.2%    | 35.0%                            | 7.9%  |                                        |        | 73.5%                            | 81.9% |
| AZD-9496    | 84.8%                    | 76.1%    | 8.4%                             | 26.0% |                                        |        | 4.4%                             |       |
| Fulvestrant | 30.0%                    | 64.9%    |                                  | 3.0%  |                                        |        | 63.5%                            | 82.4% |
| L536Q       |                          |          |                                  |       |                                        |        |                                  |       |
| endoxifen   | 18.9%*                   | 10.7%*   |                                  |       |                                        |        | 44.7%                            | 62.1% |
| AZD-9496    | 57.4%**                  | 58.7%**  | 17.4%                            | 4.6%  |                                        |        | 57.6%                            | 85.0% |
| fulvestrant | 47.20%                   | 36.6%*** | 8.4%                             | 15.1% |                                        |        | 62.7%                            | 76.7% |
| D538G       |                          |          |                                  |       |                                        |        |                                  |       |
| endoxifen   | 71.8%                    | 85.7%    |                                  | 29.4% | 18.8%                                  |        | 41.4%                            | 82.4% |
| AZD-9496    | 79.6%                    | 82.0%    | 10.0%                            | 21.5% |                                        |        | 35.3%                            | 56.0% |
| fulvestrant | 77.0%                    | 82.4%    | 7.1%                             |       |                                        |        | 69.6%                            | 83.8% |
| Y537S       |                          |          |                                  |       |                                        |        |                                  |       |
| endoxifen   | 78.5%                    | 74.8%    |                                  | 35.3% | 45.9%                                  | 71.9%  | 65.7%                            | 60.8% |
| AZD-9496    | 82.0%                    | 23.6%    | 61.5%                            |       | 87.7%                                  | ++     | 17.1%                            | 59.2% |
| fulvestrant | 81.0%                    | 42.2%*** | 12.4%                            |       | 37.4%                                  | 27.2%  | 34.2%                            | 12.3% |
| Y537N       |                          |          |                                  |       |                                        |        |                                  |       |
| endoxifen   | 85.5%                    | 84.0%    | 50.4%                            | 76.3% | 90.3%                                  | 102.4% | 22.3%                            | 5.1%  |
| AZD-9496    | 83.7%                    | 81.3%    | 67.5%                            | 69.7% | 98.1%                                  | 102.8% | 6.4%                             | 16.1% |
| fulvestrant | 71.4%                    | 83.8%    | 26.7%                            | 54.2% | 70.7%                                  | 89.7%  | 22.2%                            | 11.7% |

\*Additional hydrogen bond is formed between Y536 and W383 (Oε1···H-Nε1) with 12.2% and 31.4% occurrence in monomer A and B.

\*\*Additional hydrogen bond is formed between Y536 and W383 (Oε1···H-Nε1) with 13.1% and 14.1% occurrence in monomer A and B.

\*\*\*Additional hydrogen bond is formed between Y536 and L541 (O···H-N) with 53.9% in monomer B.

++Additional hydrogen bond is formed between S481 and W327 (Oγ···H-Nε1) with 31.4% in monomer A.

+++Additional hydrogen bond is formed between Y536 and L539 (O···H-N) with 36.8% in monomer B.



**Table S4.** Occurrence of H-bonds (%) during the last 300 ns of MD between antagonists and receptor (antagonist is always hydrogen bond acceptor).

|             | Ligand – Y526<br>(O···H-Oη) | Ligand – K529<br>(O···H <sub>3</sub> Nζ) | Ligand – C530<br>(O···H-N) | Ligand – K531<br>(O···H <sub>3</sub> Nζ)*<br>(O···H-N)'' | Ligand – N532<br>(O···H-Nδ2)*<br>(O···H-N)'' | Ligand – V534<br>(O···H-N) | Ligand – L536<br>(O···H-N) | Ligand – S537<br>(O···H-Oγ)'<br>(O···H-N)'' |
|-------------|-----------------------------|------------------------------------------|----------------------------|----------------------------------------------------------|----------------------------------------------|----------------------------|----------------------------|---------------------------------------------|
| WT          |                             |                                          |                            |                                                          |                                              |                            |                            |                                             |
| Endoxifen   |                             |                                          |                            |                                                          |                                              |                            |                            |                                             |
| AZD-9496**  |                             | 31.1%                                    | 29.7%                      |                                                          |                                              |                            |                            |                                             |
| Fulvestrant |                             |                                          |                            |                                                          |                                              |                            | 46.3%                      |                                             |
| L536Q       |                             |                                          |                            |                                                          |                                              |                            |                            |                                             |
| Endoxifen   |                             |                                          |                            |                                                          |                                              |                            |                            |                                             |
| AZD-9496**  |                             |                                          | 33.4%                      |                                                          |                                              |                            |                            |                                             |
| fulvestrant |                             |                                          | 9.1%                       | 66.9%                                                    |                                              | 34.0%                      |                            |                                             |
| D538G       |                             |                                          |                            |                                                          |                                              |                            |                            |                                             |
| endoxifen   |                             |                                          |                            |                                                          |                                              |                            |                            |                                             |
| AZD-9496**  |                             | 63.1%                                    | 44.6%                      |                                                          |                                              |                            |                            |                                             |
| fulvestrant | 49.7%                       |                                          |                            | 48.5%                                                    |                                              |                            |                            |                                             |
| Y537S       |                             |                                          |                            |                                                          |                                              |                            |                            |                                             |
| endoxifen   |                             |                                          |                            |                                                          |                                              |                            |                            |                                             |
| AZD-9496**  |                             | 32.7%                                    |                            | 22.1%                                                    | 15.3%'                                       |                            | 69.2%                      | 38.0%'<br>36.1%''                           |
| fulvestrant |                             |                                          |                            |                                                          | 8.19%'                                       |                            | 10.0%                      | 71.6%                                       |
| Y537N       |                             |                                          |                            |                                                          |                                              |                            |                            |                                             |
| endoxifen   |                             |                                          |                            |                                                          |                                              |                            |                            |                                             |
| AZD-9496**  | 9.1%                        | 19.0%                                    | 25.3%                      |                                                          | 35.7%''                                      | 6.7%''                     |                            |                                             |
| fulvestrant |                             |                                          |                            |                                                          | 12.7%''                                      | 10.9%''                    |                            |                                             |

\*Sum of hydrogen bond occurrences formed with the whole terminal amino group (H $\zeta$ 1+H $\zeta$ 2+H $\zeta$ 3).

\*\*Sum of hydrogen bond occurrences formed with both oxygen atoms of the ligand's carboxylic group.

**Table S5.** Occurrence of H-bonds (%) during the last 300 ns of MD between antagonists and receptor (antagonist is always hydrogen bond donor).

|             | L346 – ligand<br>(O···H-N) |       | E353 – ligand<br>(Oε1/Oε2···H-O) |       | E419 – ligand<br>(O···H-O) |       | G420 – ligand<br>(O···H-O) |       | S527 – ligand<br>(O···H-N) |       |
|-------------|----------------------------|-------|----------------------------------|-------|----------------------------|-------|----------------------------|-------|----------------------------|-------|
| WT          |                            |       |                                  |       |                            |       |                            |       |                            |       |
| endoxifen   |                            |       | 82.7%                            | 93.4% |                            |       |                            |       |                            | 57.6% |
| AZD-9496    | 83.9%                      | 81.8% |                                  |       |                            |       |                            |       |                            |       |
| fulvestrant |                            |       | 82.3%                            | 89.3% | 52.9%                      | 77.3% | 21.4%                      | 10.7% |                            |       |
| L536Q       |                            |       |                                  |       |                            |       |                            |       |                            |       |
| endoxifen   |                            |       | 92.8%                            | 80.4% |                            |       |                            |       | 41.1%                      |       |
| AZD-9496    | 69.1%                      | 78.0% |                                  |       |                            |       |                            |       |                            |       |
| fulvestrant |                            |       | 69.9%                            | 64.1% | 73.1%                      | 68.1% | 6.5%                       | 23.2% |                            |       |
| D538G       |                            |       |                                  |       |                            |       |                            |       |                            |       |
| endoxifen   |                            |       | 67.2%                            | 88.3% |                            |       |                            |       |                            |       |
| AZD-9496    | 71.2%                      | 72.4% |                                  |       |                            |       |                            |       |                            |       |
| fulvestrant |                            |       | 84.5%                            | 77.4% | *                          | 79.2% |                            | 6.9%  |                            |       |
| Y537S       |                            |       |                                  |       |                            |       |                            |       |                            |       |
| endoxifen   |                            |       | 78.5%                            | 86.7% |                            |       |                            |       |                            |       |
| AZD-9496    | 74.8%                      | 79.6% |                                  |       |                            |       |                            |       |                            |       |
| fulvestrant |                            |       | 65.9%                            | 95.0% | 30.3%**                    | 73.3% | 23.1%                      | 12.7% |                            |       |
| Y537N       |                            |       |                                  |       |                            |       |                            |       |                            |       |
| endoxifen   |                            |       | 92.2%                            | 37.2% |                            |       |                            |       | 16.6%                      |       |
| AZD-9496    | 80.6%                      | 74.1% |                                  |       |                            |       |                            |       |                            |       |
| fulvestrant |                            |       | 95.4%                            | 48.6% | 91.7%                      | 56.3% |                            | 27.0% |                            |       |

\*Here fulvestrant instead forms hydrogen bond with H524 (Nδ1···H-O) with occurrence of 94.8%.

\*\*Here fulvestrant forms additional hydrogen bond with H524 (Nδ1···H-O) with occurrence of 23.2%.

**Table S6.** Interaction energies (kJ/mol) between relevant parts of the receptor (H5 and H6 against H12 and coil connecting H11 and H12) and the ligand during the analyzed 300 ns of molecular dynamics.

|             | (H5+H6)-(H12+loop) |             | (H5+H6)-ligand |           | (loop+H12)-ligand |             |
|-------------|--------------------|-------------|----------------|-----------|-------------------|-------------|
| WT          |                    |             |                |           |                   |             |
| Endoxifen   | -227.6±9.6         | -201.4±6.7  | -54.9±1.6      | -36.5±1.3 | -7.7±0.9          | -45.4±2.1   |
| AZD-9496    | -208.0±3.6         | -241.4±4.6  | -49.3±1.0      | -49.4±0.8 | -91.7±9.4         | -65.8±8.4   |
| fulvestrant | -126.6±7.1         | -200.9±7.5  | -47.9±2.5      | -46.6±2.8 | -117.7±12.8       | -69.9±13.0  |
| L536Q       |                    |             |                |           |                   |             |
| endoxifen   | -147.8±20.4        | -157.5±10.4 | -32.8±1.3      | -47.6±1.1 | -50.1±5.4         | -43.6±7.4   |
| AZD-9496    | -227.8±6.7         | -222.0±4.6  | -47.6±1.2      | -49.2±0.6 | -16.9±12.1        | -69.7±5.0   |
| fulvestrant | -216.8±7.8         | -219.4±11.0 | -58.2±2.4      | -84.5±3.9 | -112.9±4.9        | -93.9±13.6  |
| D538G       |                    |             |                |           |                   |             |
| endoxifen   | -112.6±9.1         | -202.9±11.7 | -41.2±1.4      | -48.4±2.2 | -66.2±3.3         | -16.8±4.1   |
| AZD-9496    | -230.3±7.1         | -203.8±11.7 | -51.2±0.9      | -50.7±1.2 | -104.9±6.0        | -75.0±10.8  |
| fulvestrant | -220.2±4.5         | -199.2±5.9  | -66.3±1.9      | -61.8±3.4 | -42.7±2.6         | -105.2±9.4  |
| Y537S       |                    |             |                |           |                   |             |
| endoxifen   | -196.0±8.1         | -231.7±12.8 | -52.8±1.3      | -40.4±1.6 | -35.0±5.8         | -48.5±4.7   |
| AZD-9496    | -330.0±15.4        | -145.4±7.8  | -51.2±1.2      | -57.6±3.0 | -97.1±5.4         | -196.3±28.2 |
| fulvestrant | -193.3±31.2        | -163.6±12.3 | -70.6±10.4     | -84.7±2.2 | -85.1±11.6        | -99.5±5.1   |
| Y537N       |                    |             |                |           |                   |             |
| endoxifen   | -277.1±13.7        | -306.4±10.8 | -39.0±1.3      | -42.7±2.6 | -34.6±1.7         | -13.9±0.6   |
| AZD-9496    | -306.3±7.5         | -289.6±7.5  | -50.5±1.0      | -48.6±1.5 | -84.7±9.8         | -54.4±13.1  |
| fulvestrant | -228.4±17.4        | -294.8±14.3 | -42.1±1.7      | -64.7±4.9 | -88.6±16.1        | -67.1±6.5   |

## References

- 1 Fanning, S. W. *et al.* Estrogen receptor alpha somatic mutations Y537S and D538G confer breast cancer endocrine resistance by stabilizing the activating function-2 binding conformation. *eLife* **5**, (2016).
- 2 Merenbakh-Lamin, K. *et al.* D538G mutation in estrogen receptor-alpha: A novel mechanism for acquired endocrine resistance in breast cancer. *Cancer Res.* **73**, 6856-6864, (2013).
- 3 Palermo, G., Miao, Y., Walker, R. C., Jinek, M. & McCammon, J. A. Striking plasticity of CRISPR-Cas9 and key role of non-target DNA, as revealed by molecular simulations. *ACS Cent. Sci.* **2**, 756-763, (2016).
- 4 Pettersen, E. F. *et al.* UCSF Chimera--a visualization system for exploratory research and analysis. *J. Comput. Chem.* **25**, 1605-1612, (2004).
